# Supplementary material
Source: publisher figshare collection journal article supplement (https://acs.figshare.com/ndownloader/files/4670428)
Supplement: Supplementary file 1 [file 4670428]

## **SPECTROSCOPIC DATA**

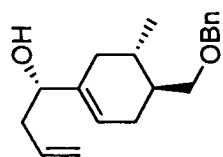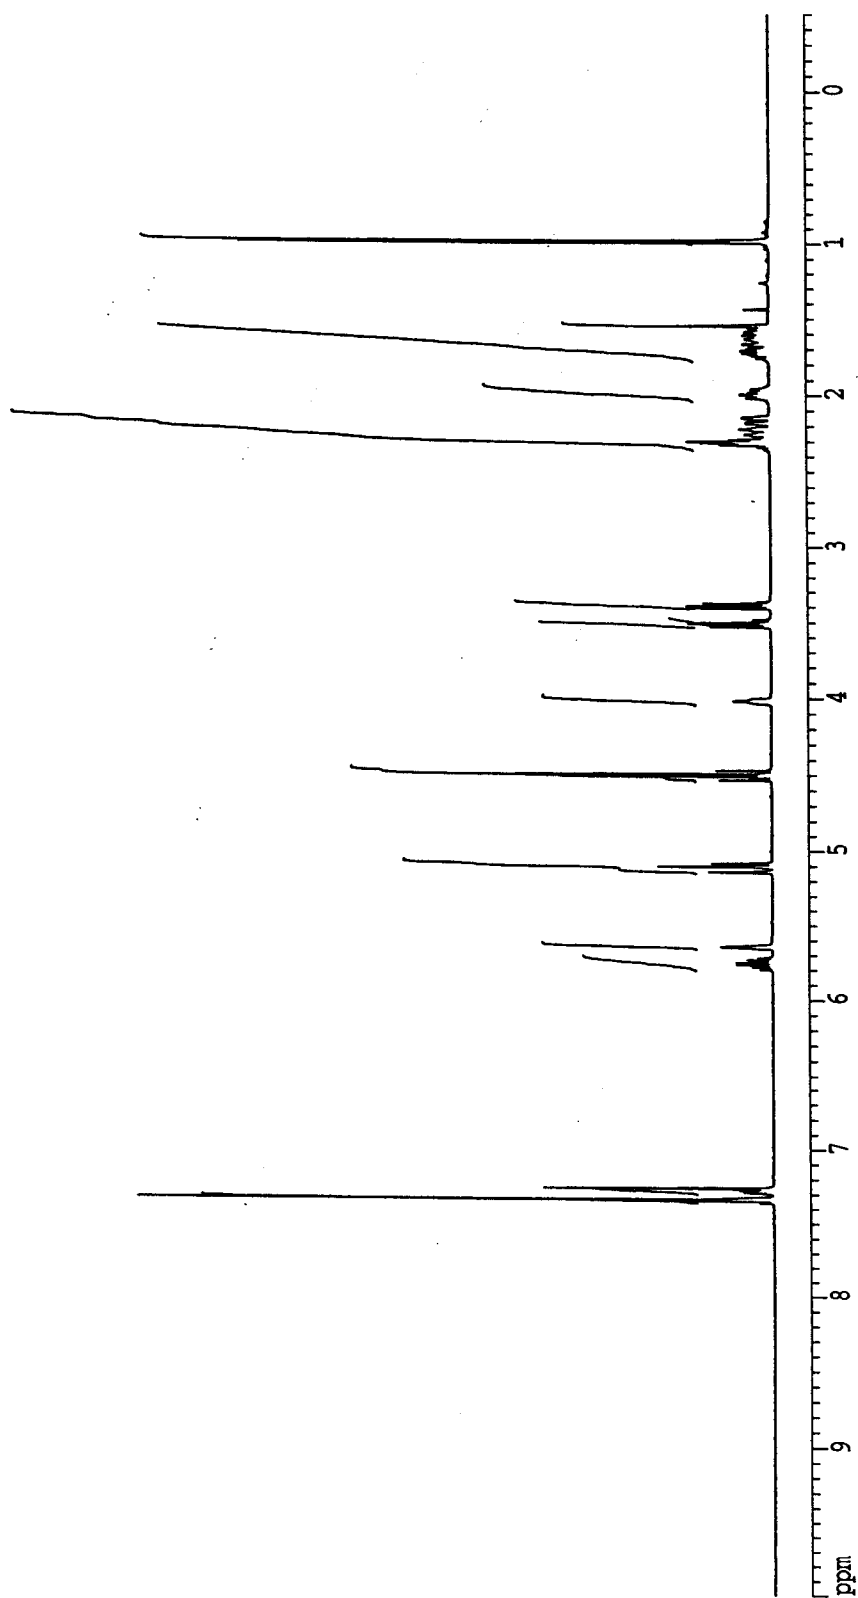

500 MHz  $^1\text{H}$  Spectrum of (+)-17 in  $\text{CDCl}_3$

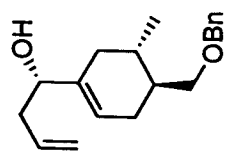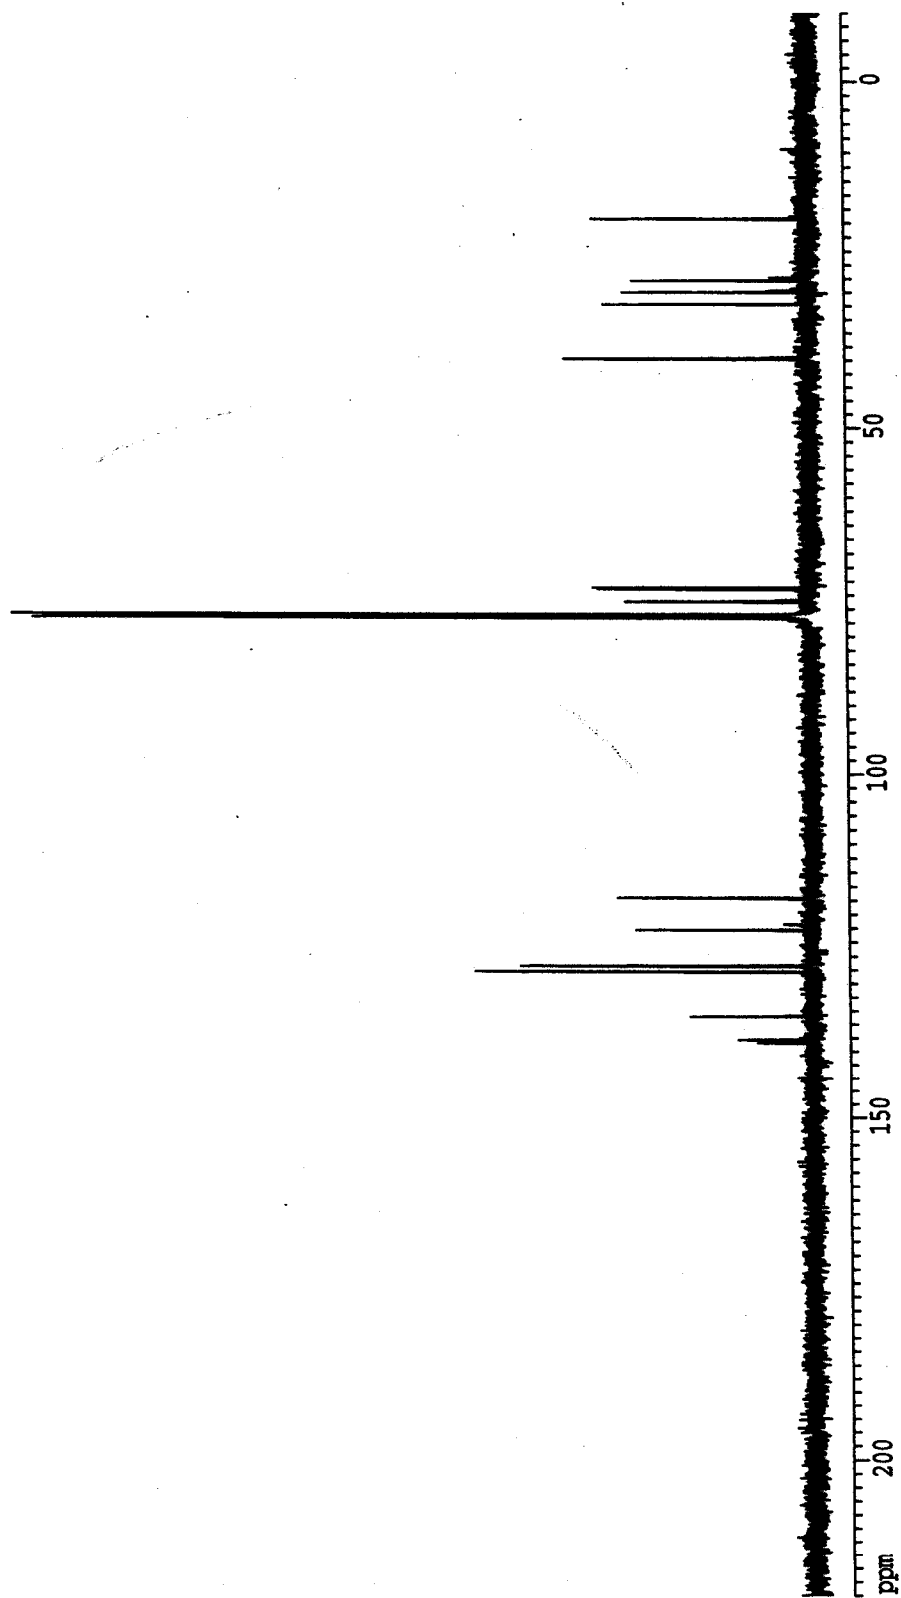

125 MHz  $^{13}\text{C}$  Spectrum of (+)-17 in  $\text{CDCl}_3$

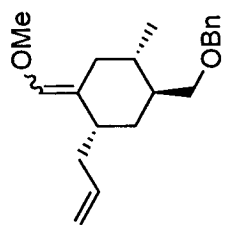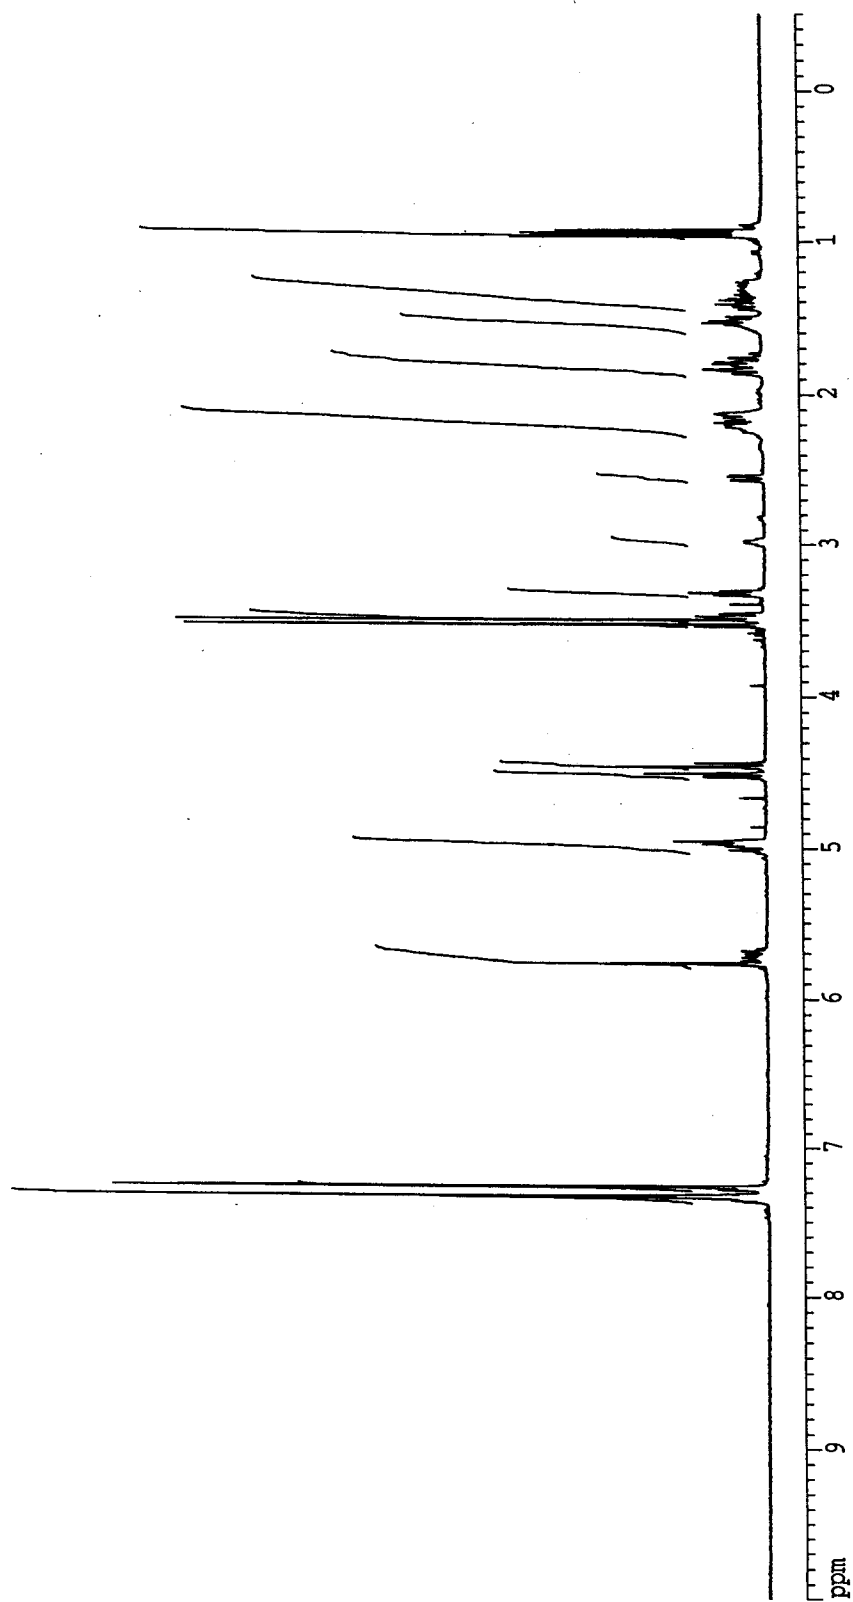

500 MHz  $^1\text{H}$  Spectrum of **18** in  $\text{CDCl}_3$

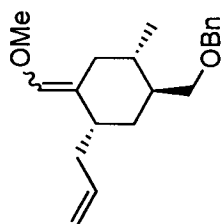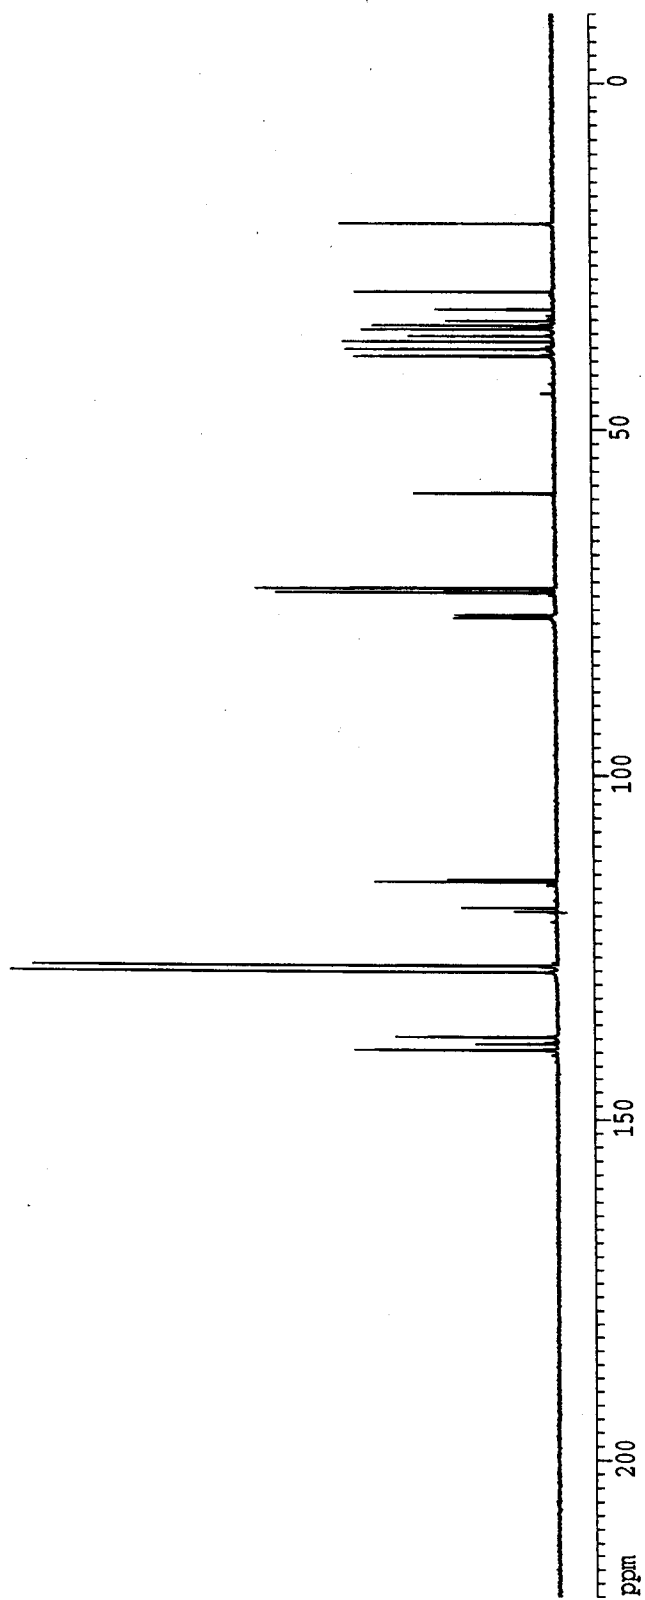

125 MHz  $^{13}\text{C}$  Spectrum of **18** in  $\text{CDCl}_3$

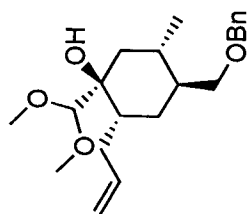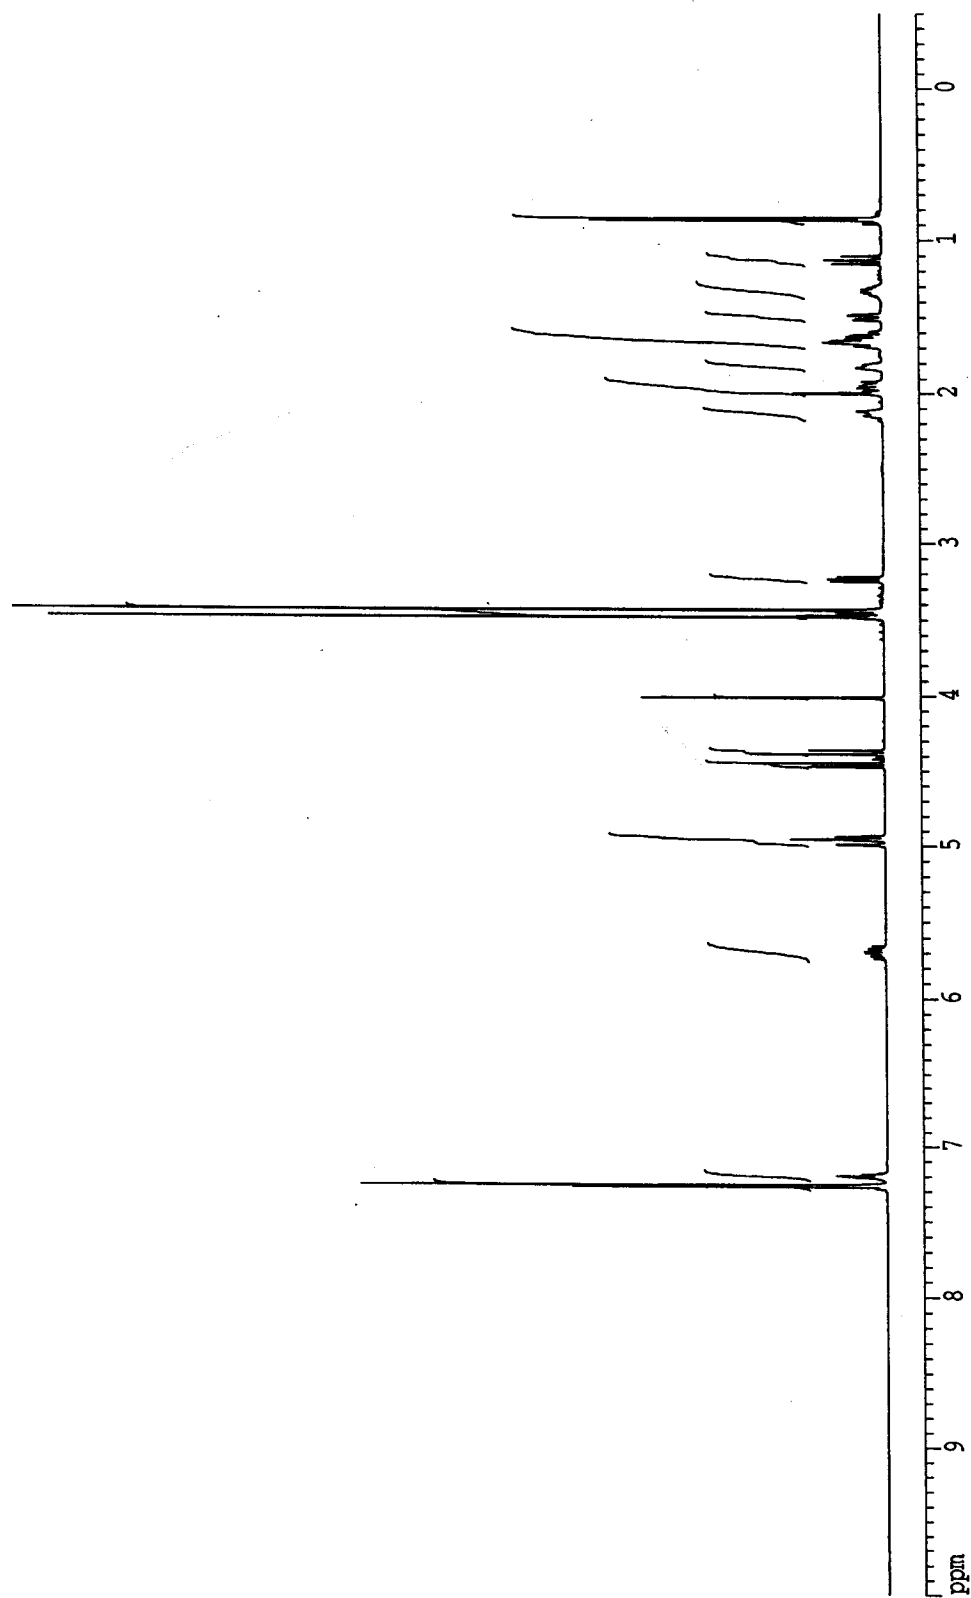

500 MHz  $^1\text{H}$  Spectrum of (+)-**S1** in  $\text{CDCl}_3$

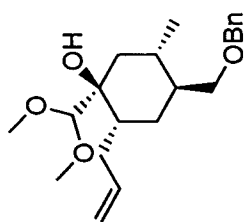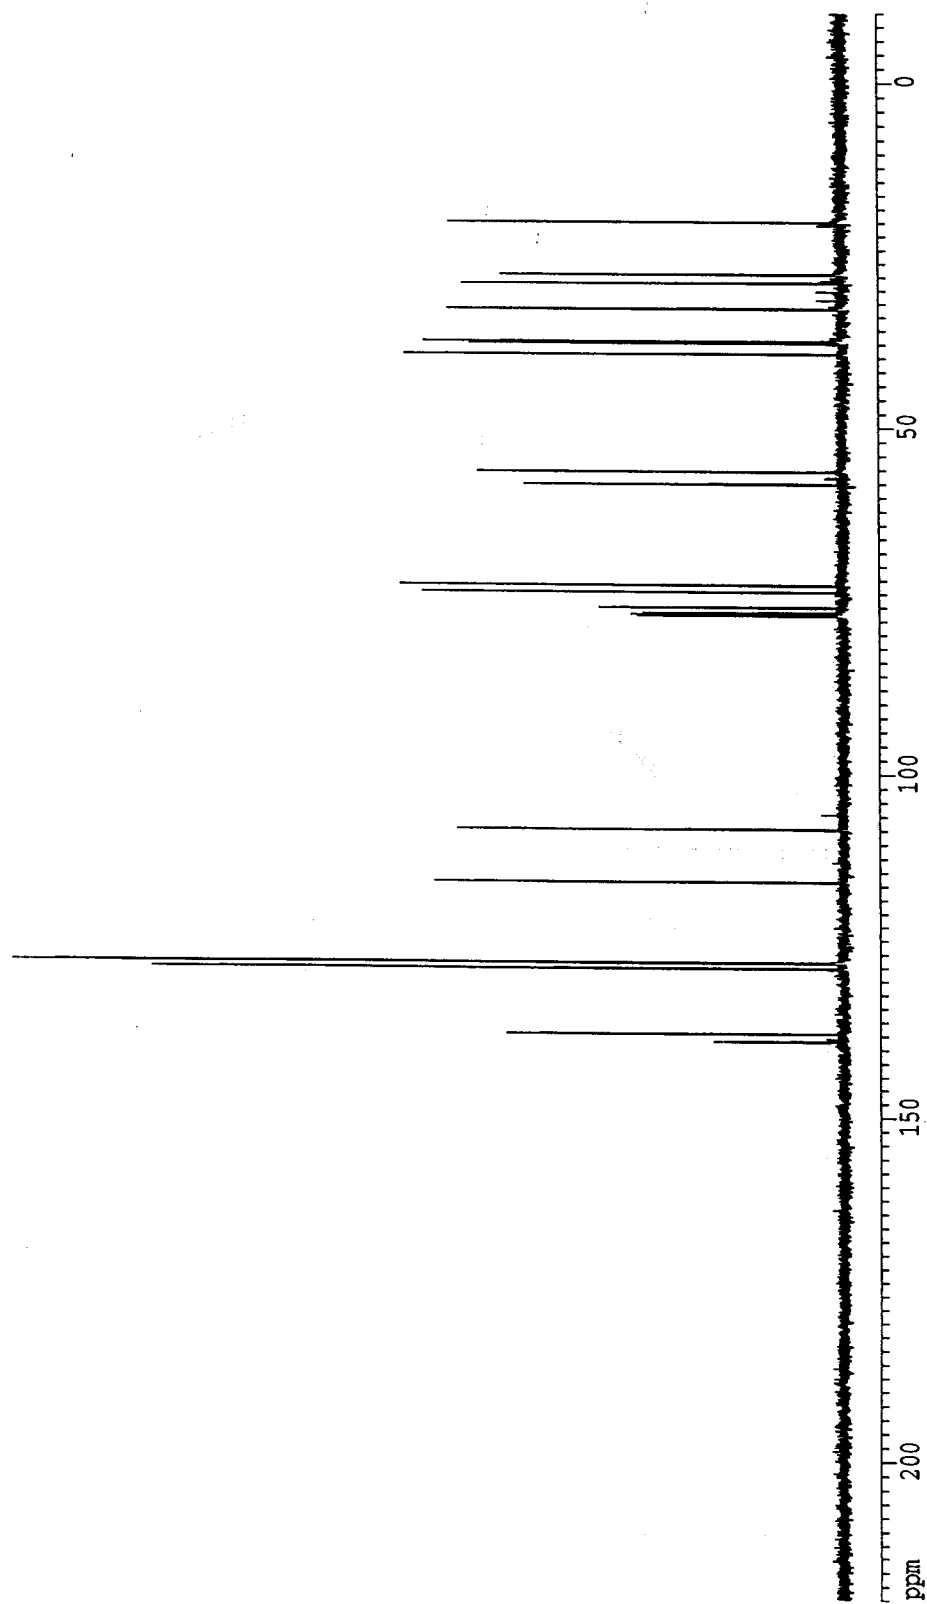

125 MHz <sup>13</sup>C Spectrum of (+)-S1 in CDCl<sub>3</sub>

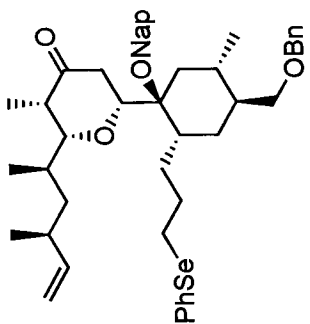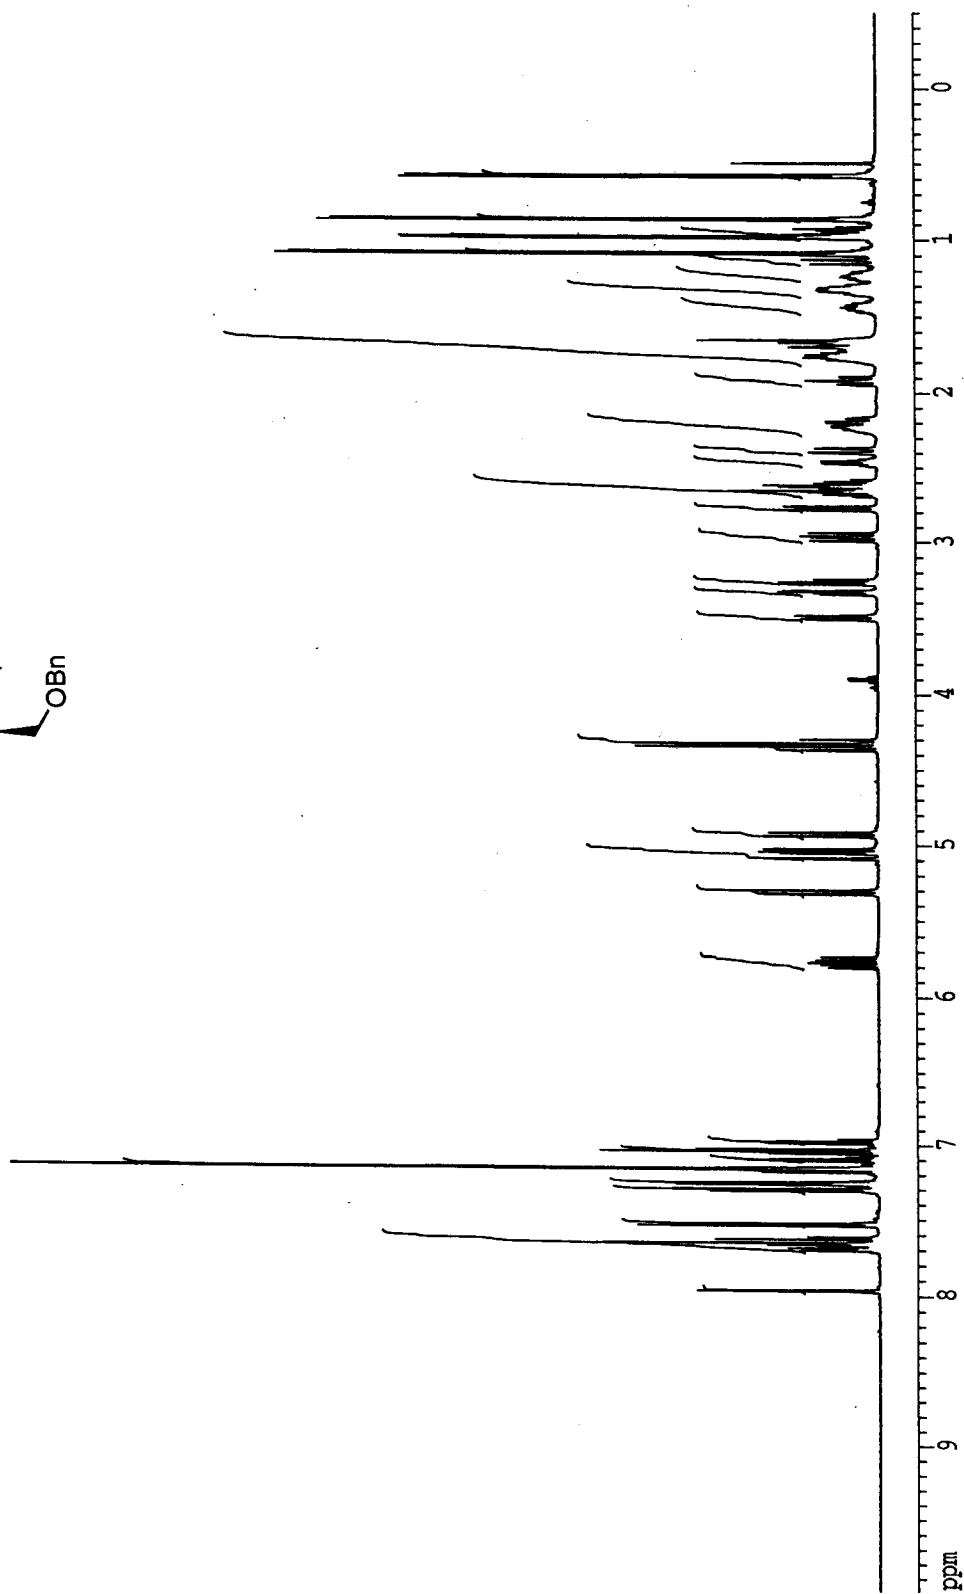

500 MHz  $^1\text{H}$  Spectrum of (+)-**24** in  $\text{C}_6\text{D}_6$



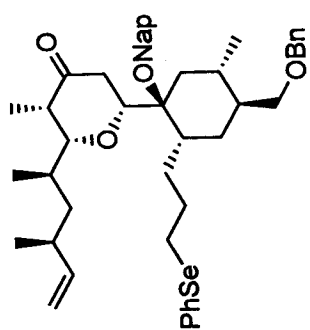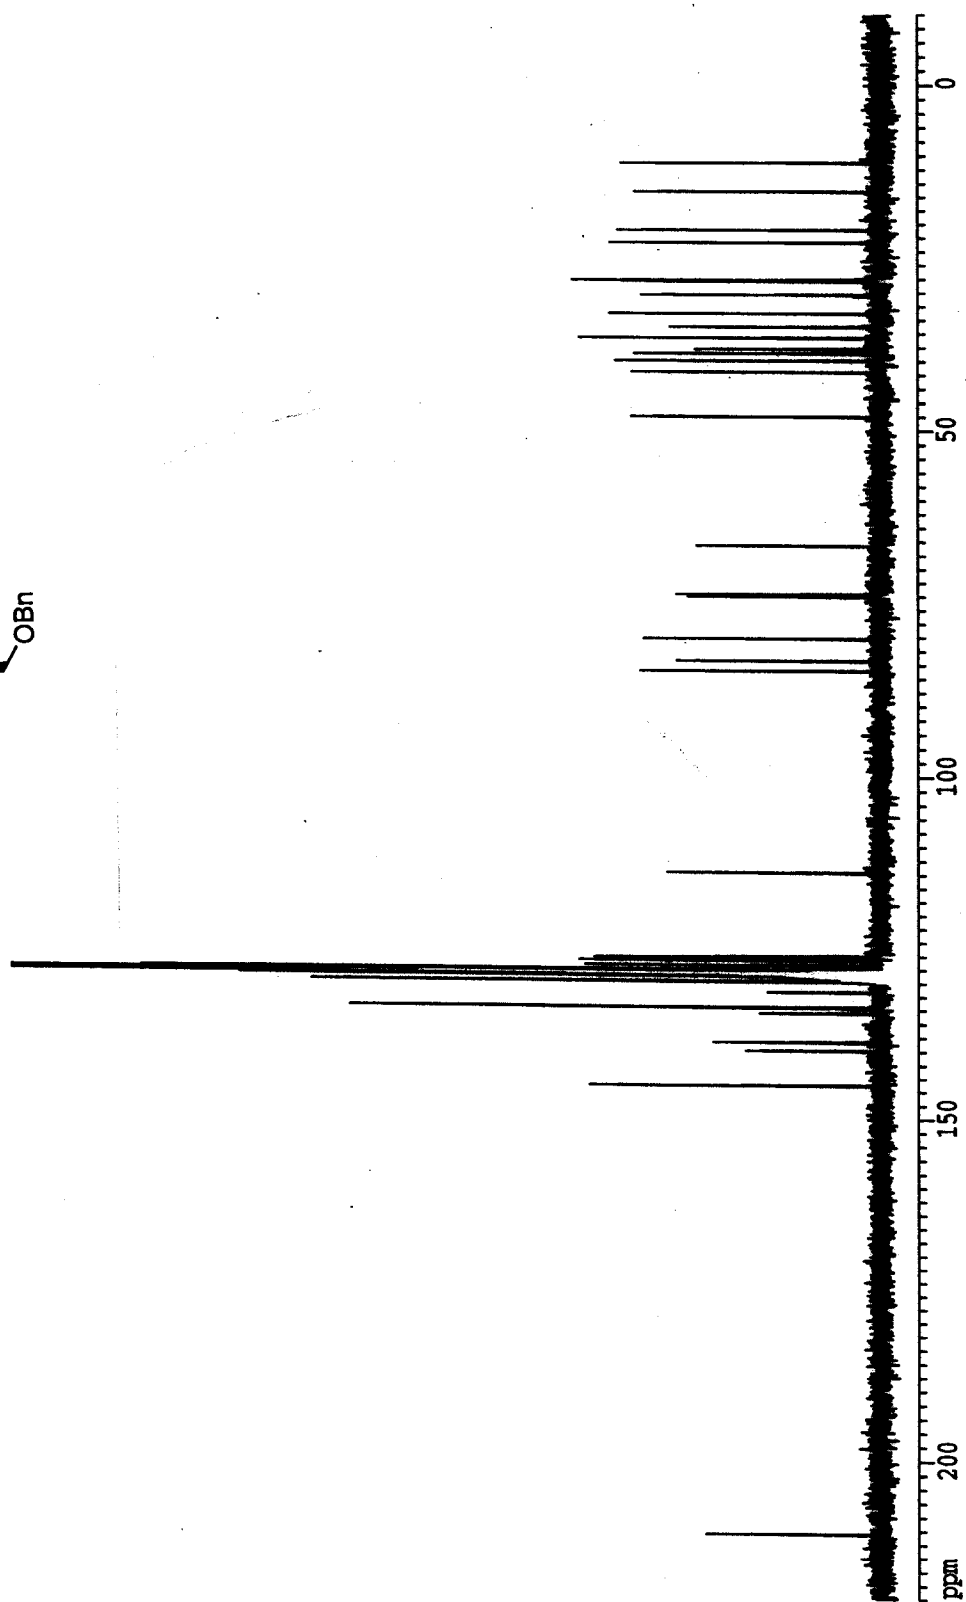

125 MHz  $^{13}\text{C}$  Spectrum of (+)-24 in  $\text{C}_6\text{D}_6$

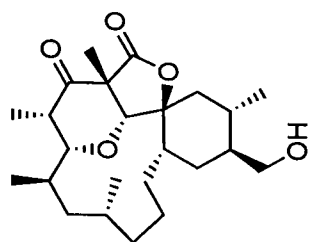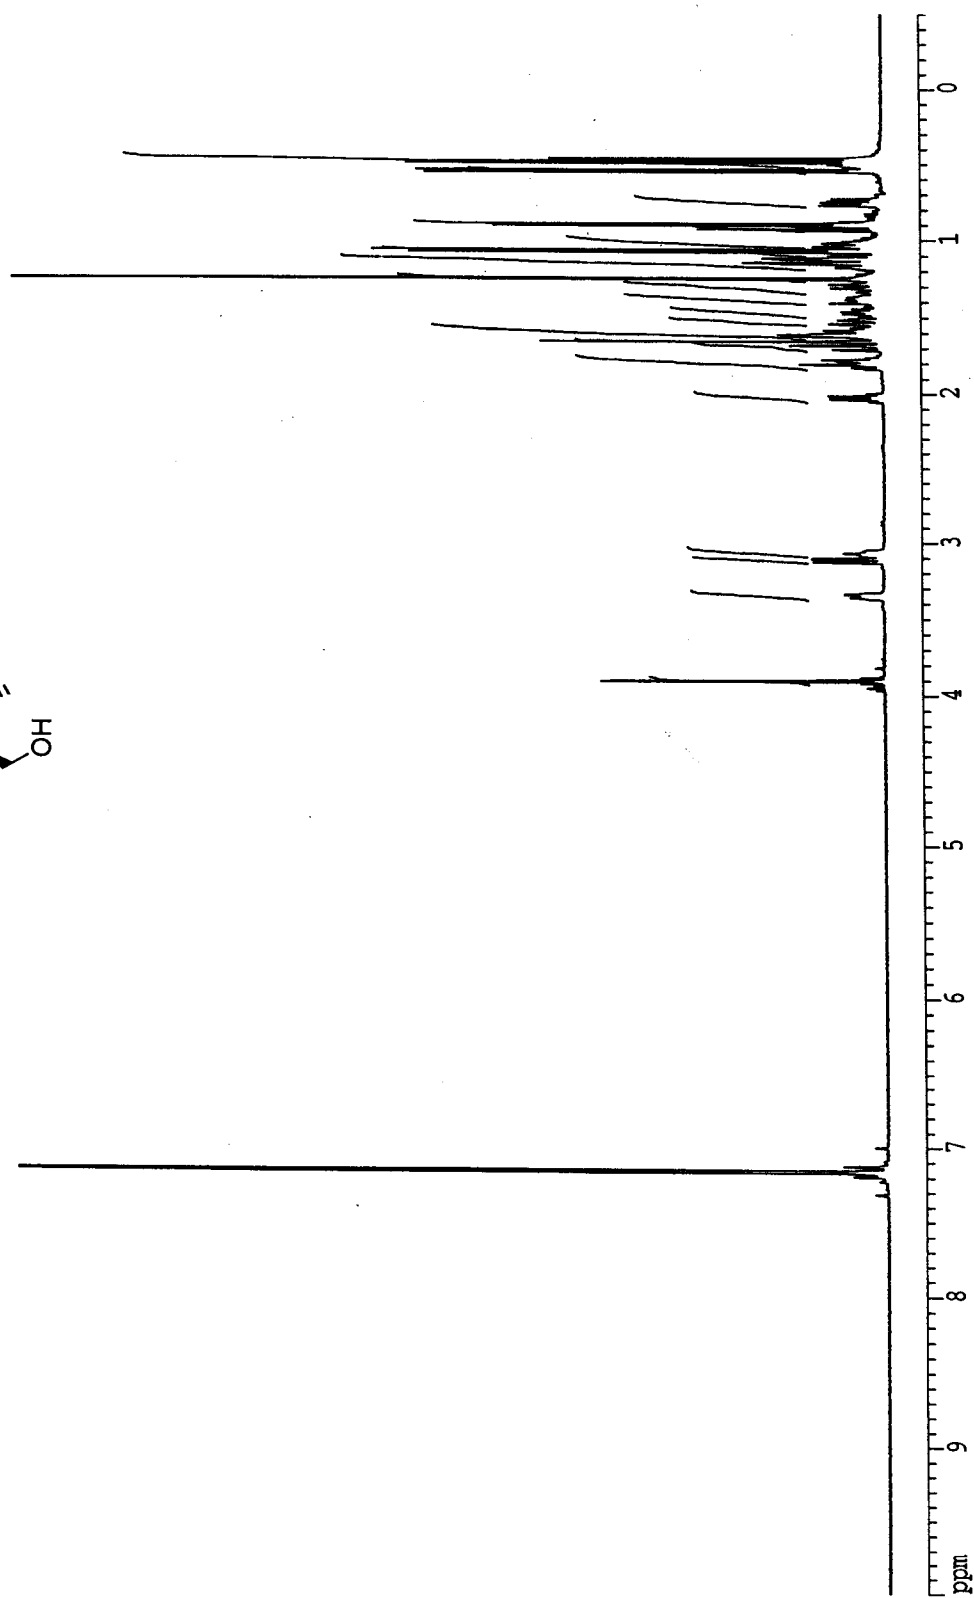

500 MHz  $^1\text{H}$  Spectrum of (-)-**29** in  $\text{C}_6\text{D}_6$

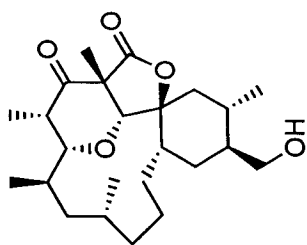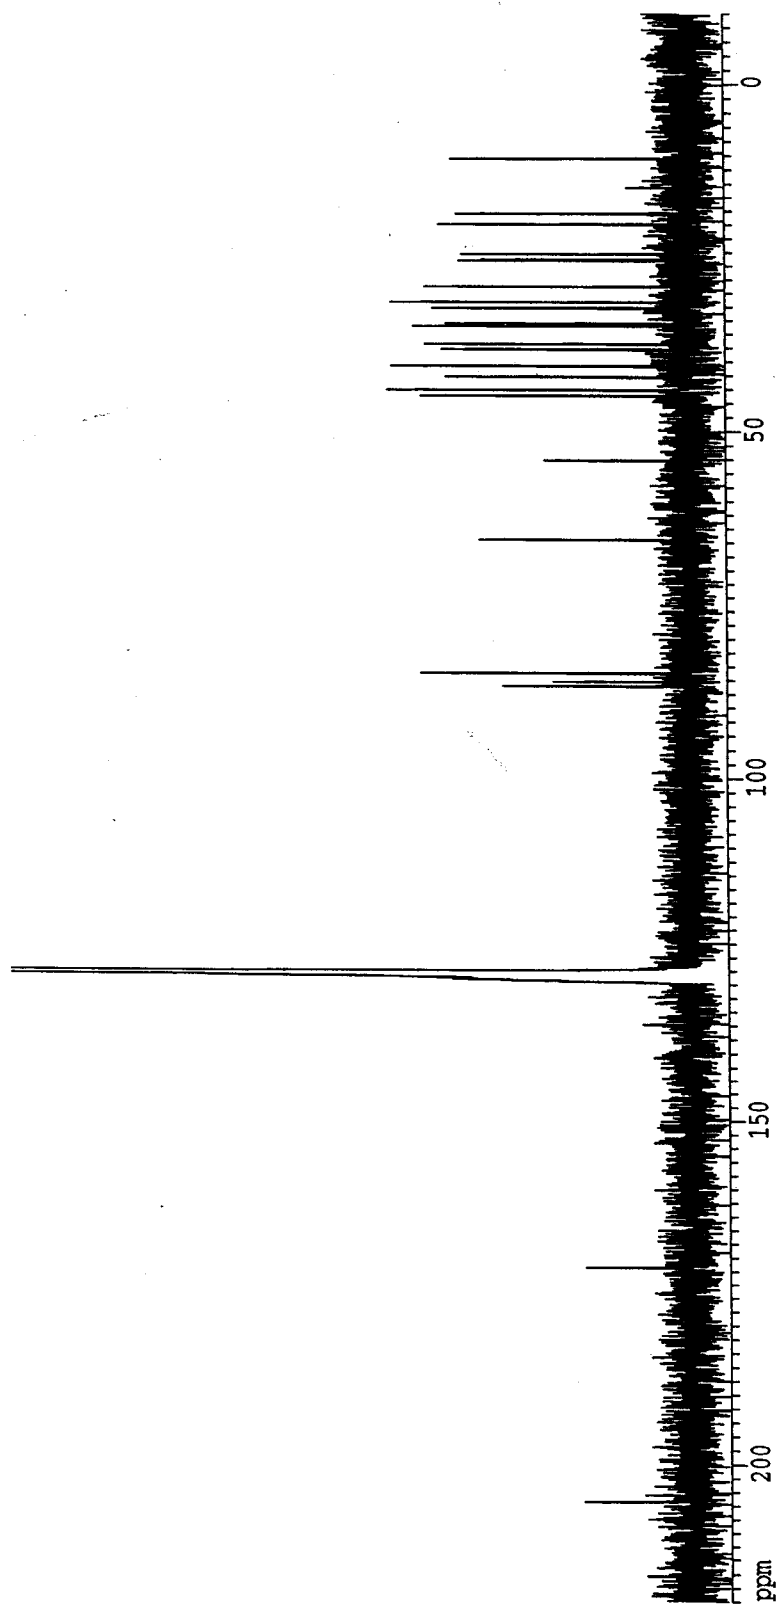

125 MHz  $^{13}\text{C}$  Spectrum of (-)-**29** in  $\text{C}_6\text{D}_6$

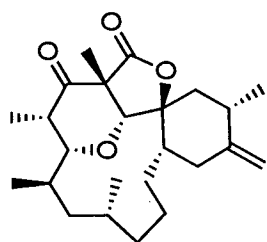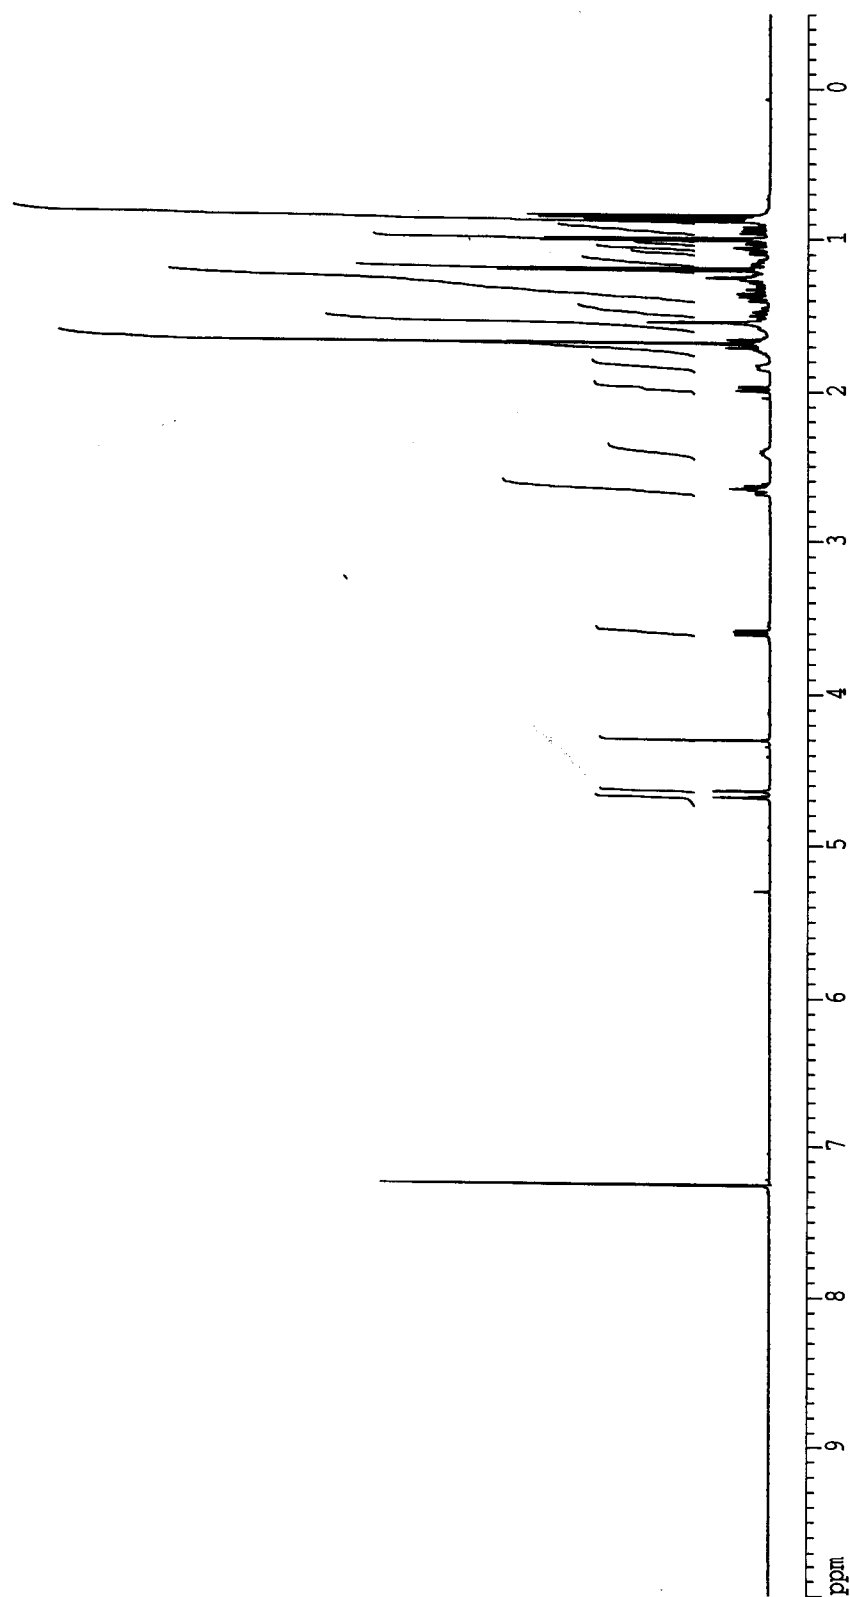

500 MHz <sup>1</sup>H Spectrum of (-)-**33** in CDCl<sub>3</sub>

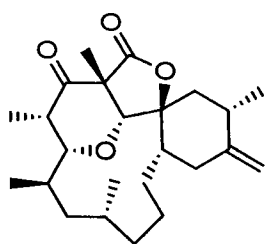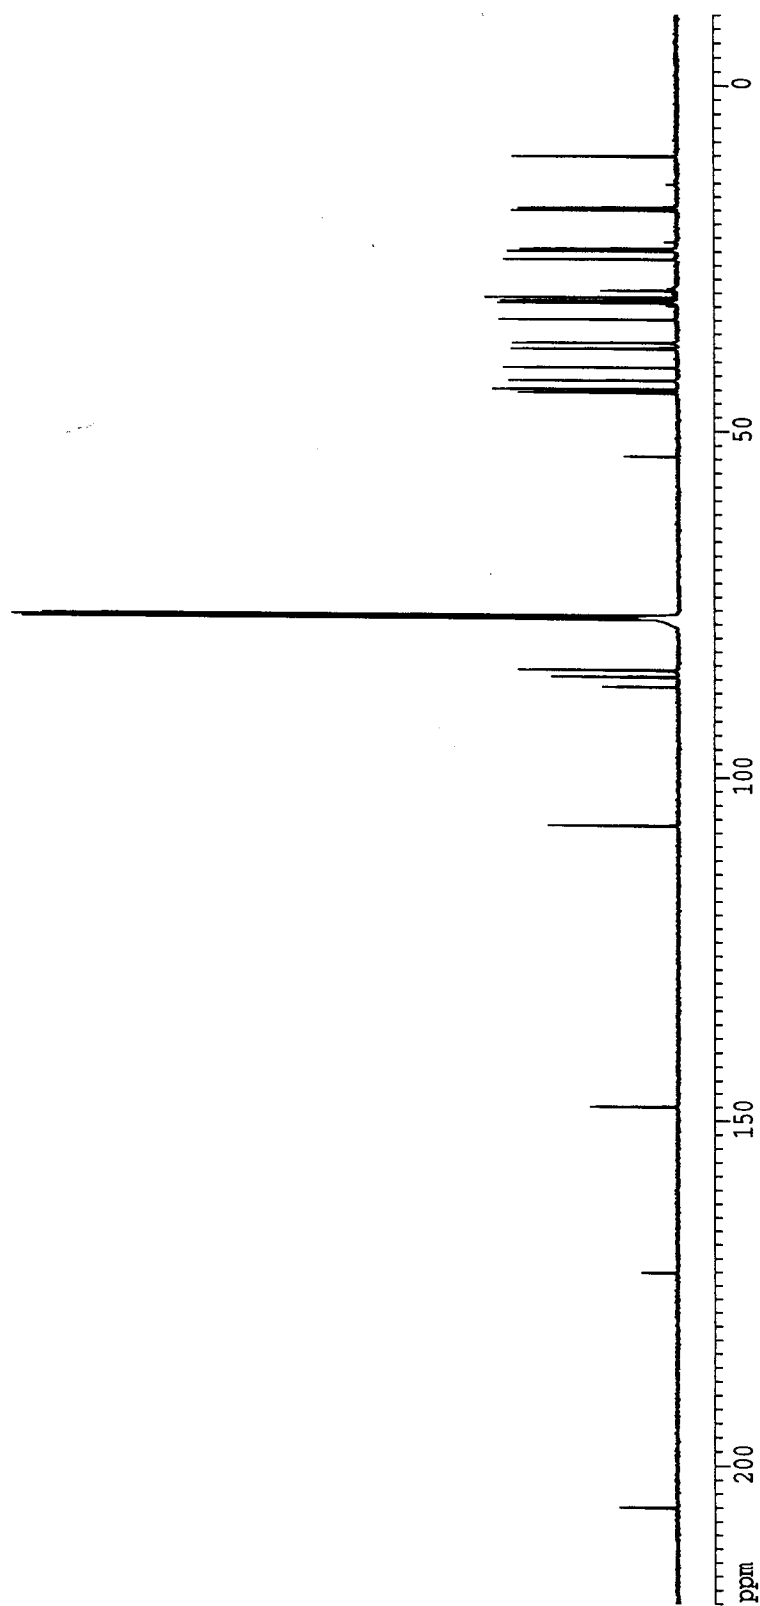

125 MHz  $^{13}\text{C}$  Spectrum of (-)-**33** in  $\text{CDCl}_3$

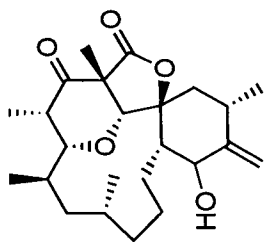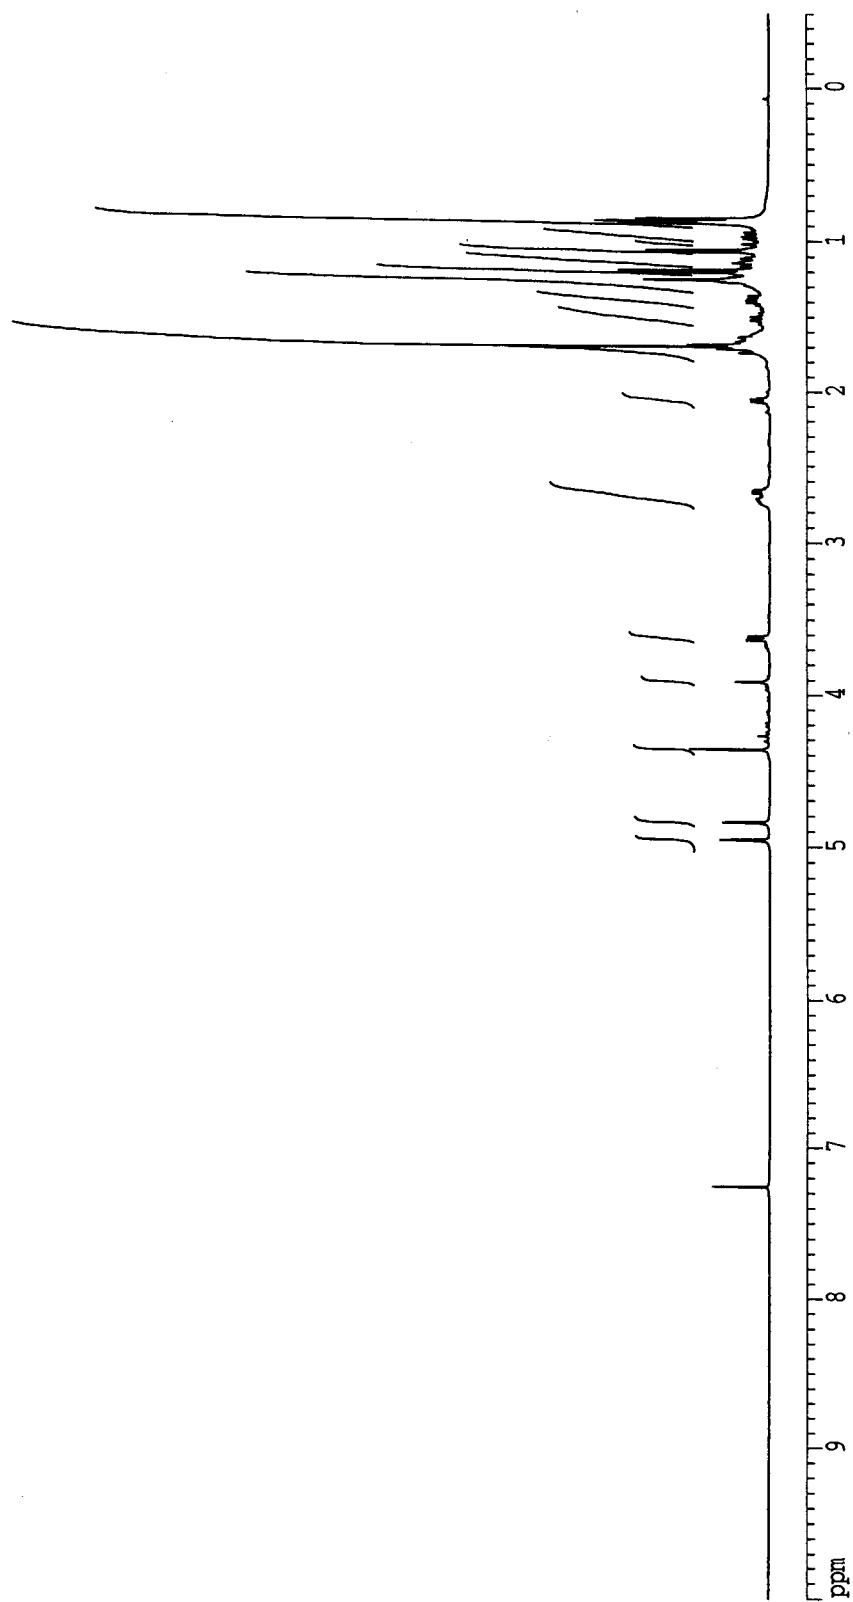

500 MHz <sup>1</sup>H Spectrum of (-)-**S4** in CDCl<sub>3</sub>

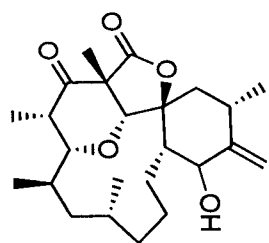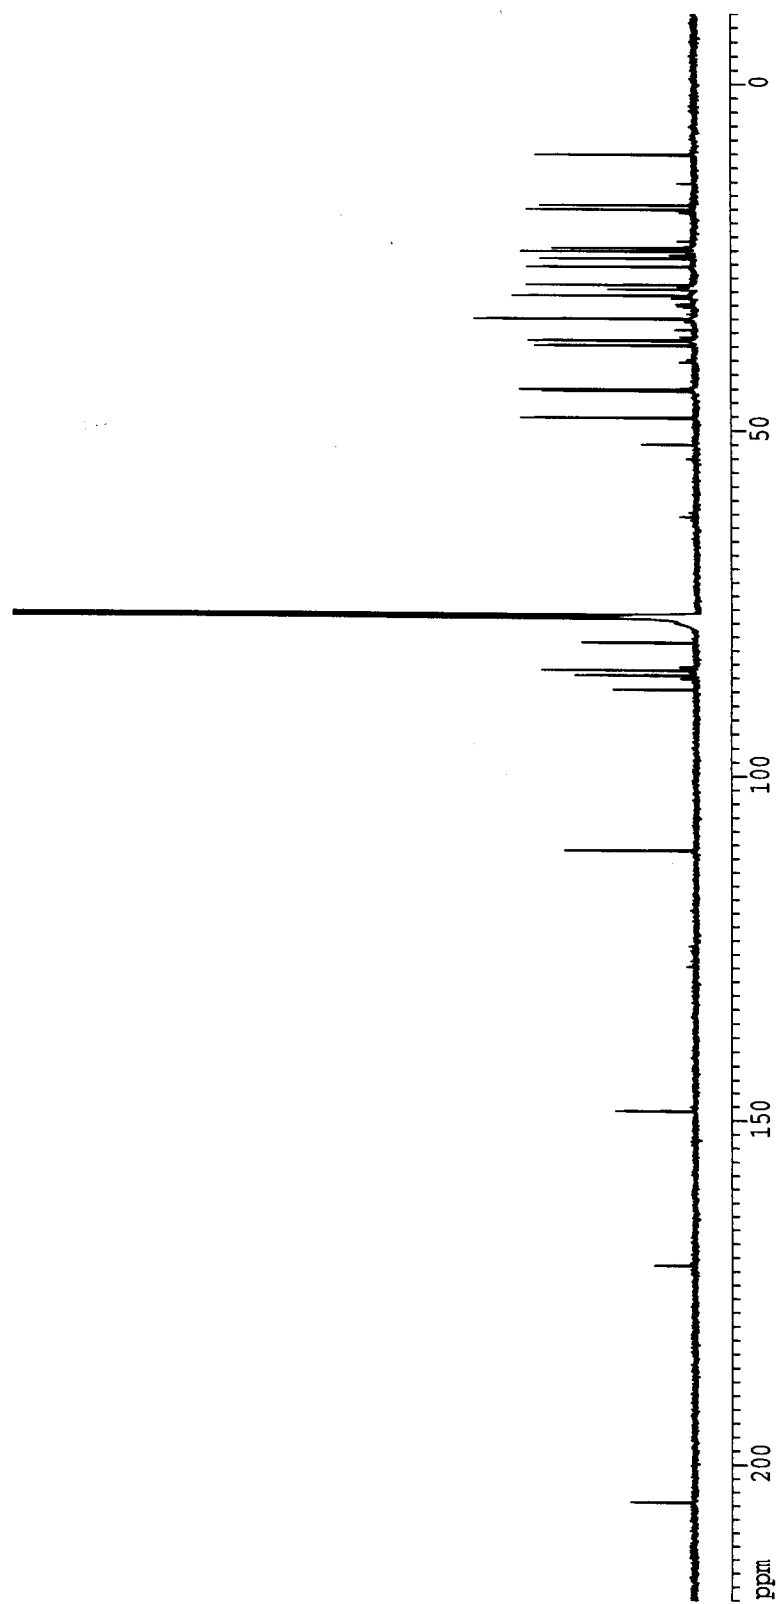

125 MHz  $^{13}\text{C}$  Spectrum of (-)-**S4** in  $\text{CDCl}_3$

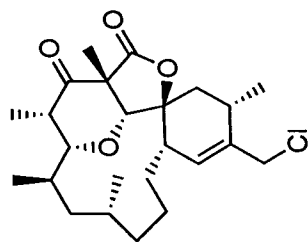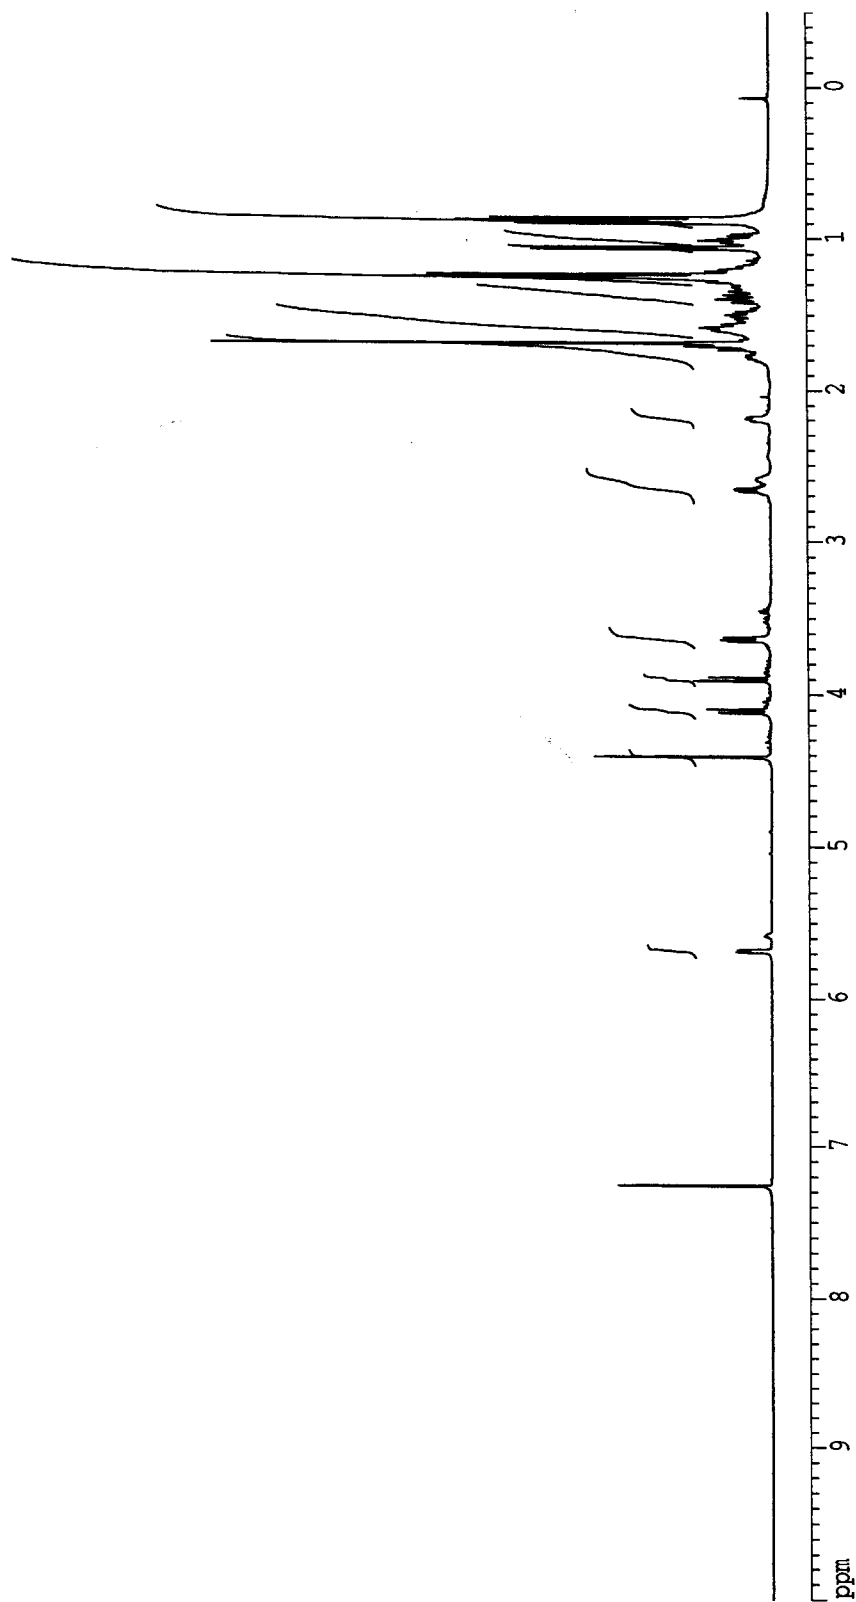

500 MHz <sup>1</sup>H Spectrum of (-)-**34** in CDCl<sub>3</sub>



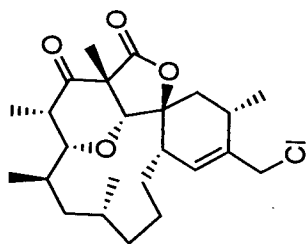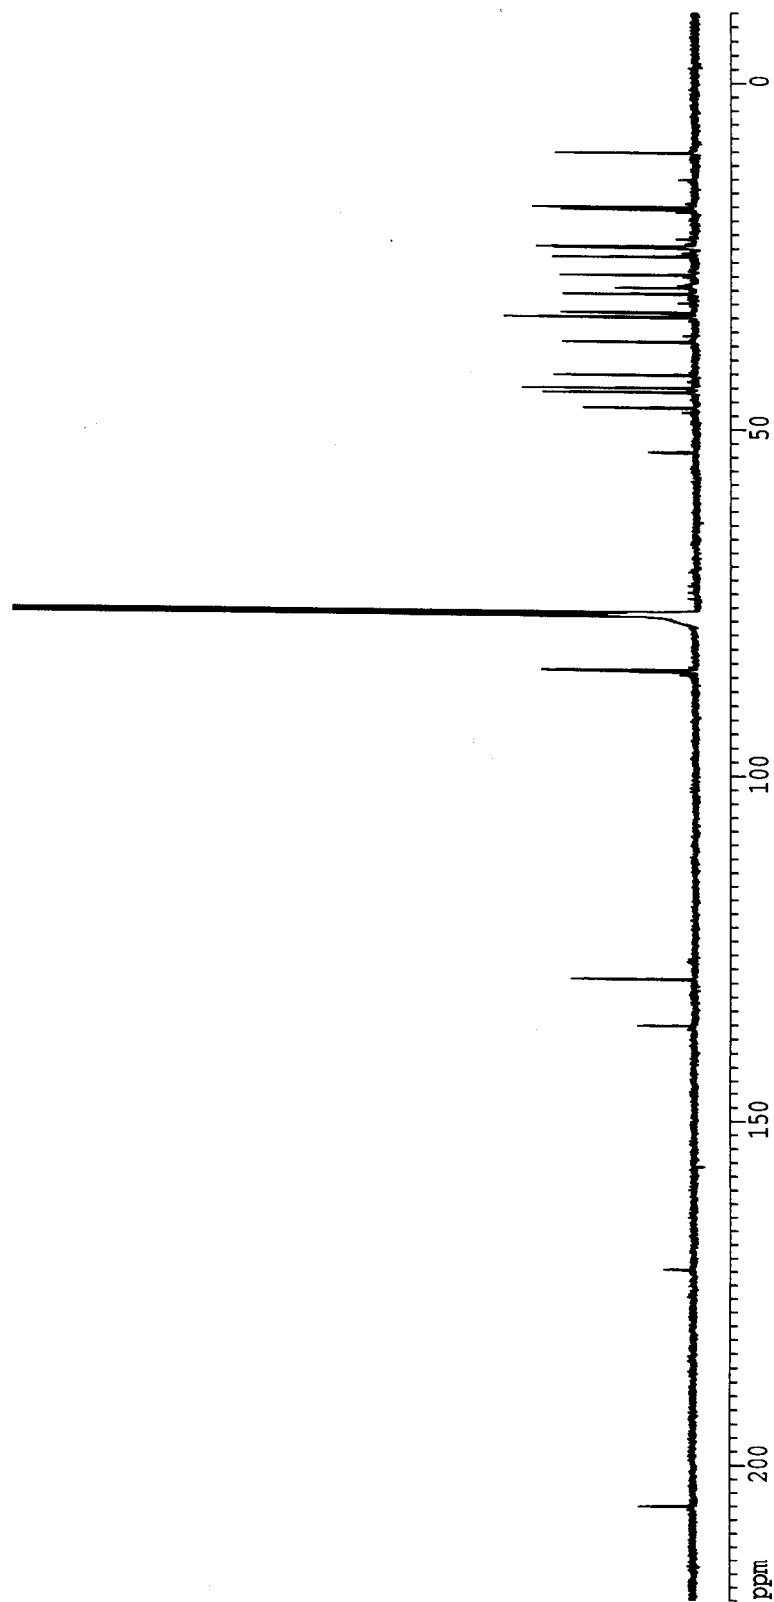

125 MHz  $^{13}\text{C}$  Spectrum of (-)-**34** in  $\text{CDCl}_3$

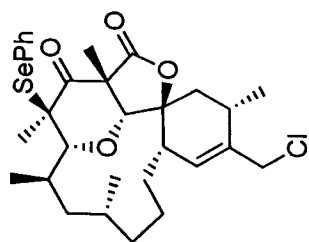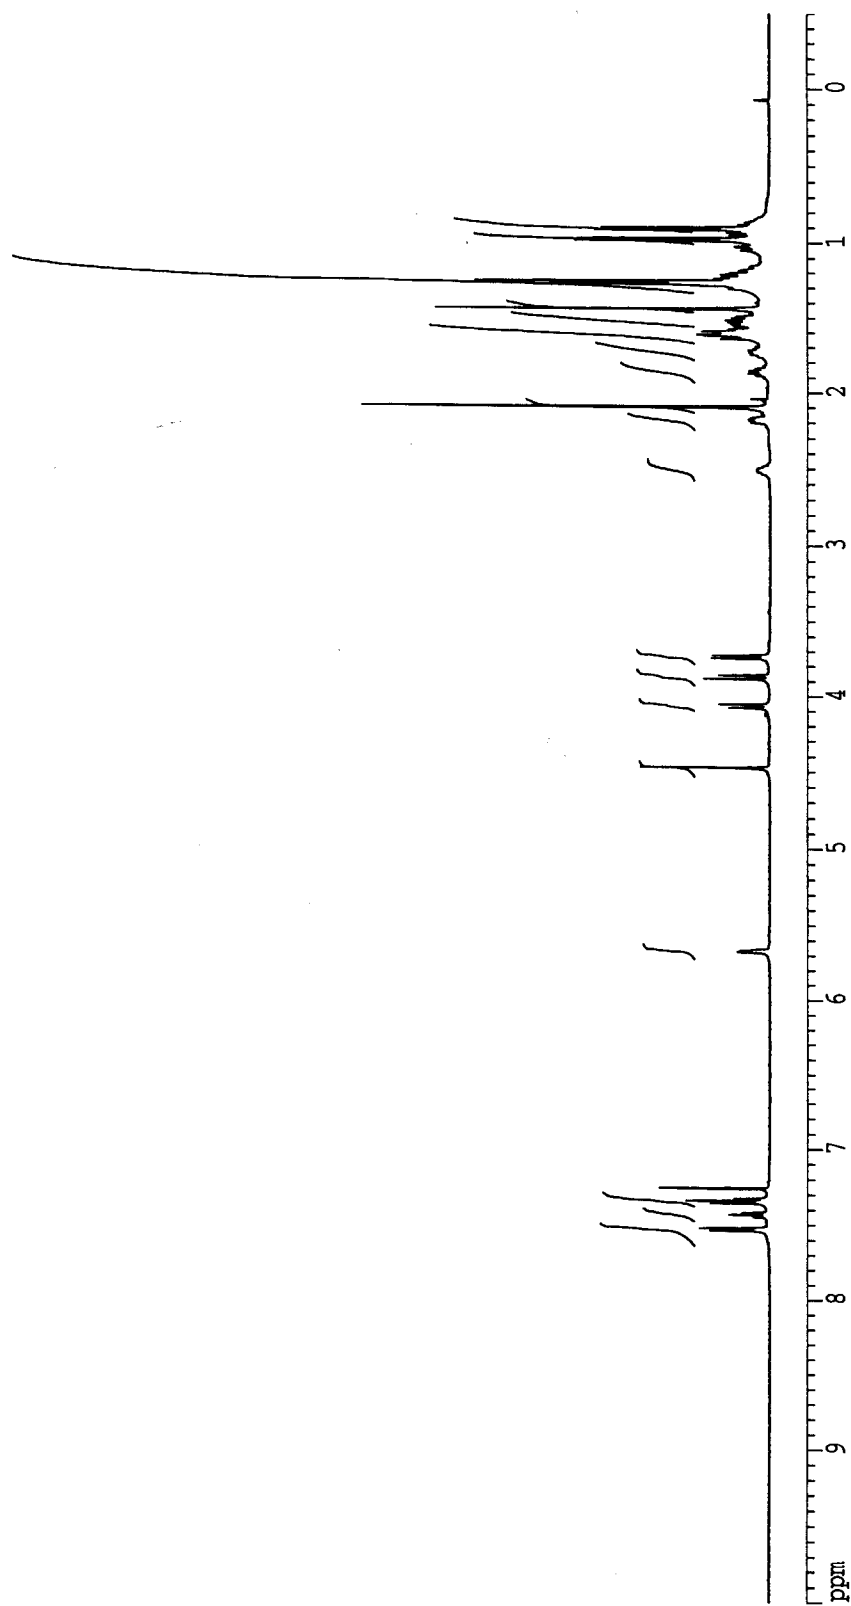

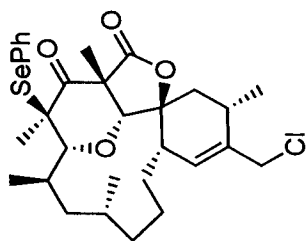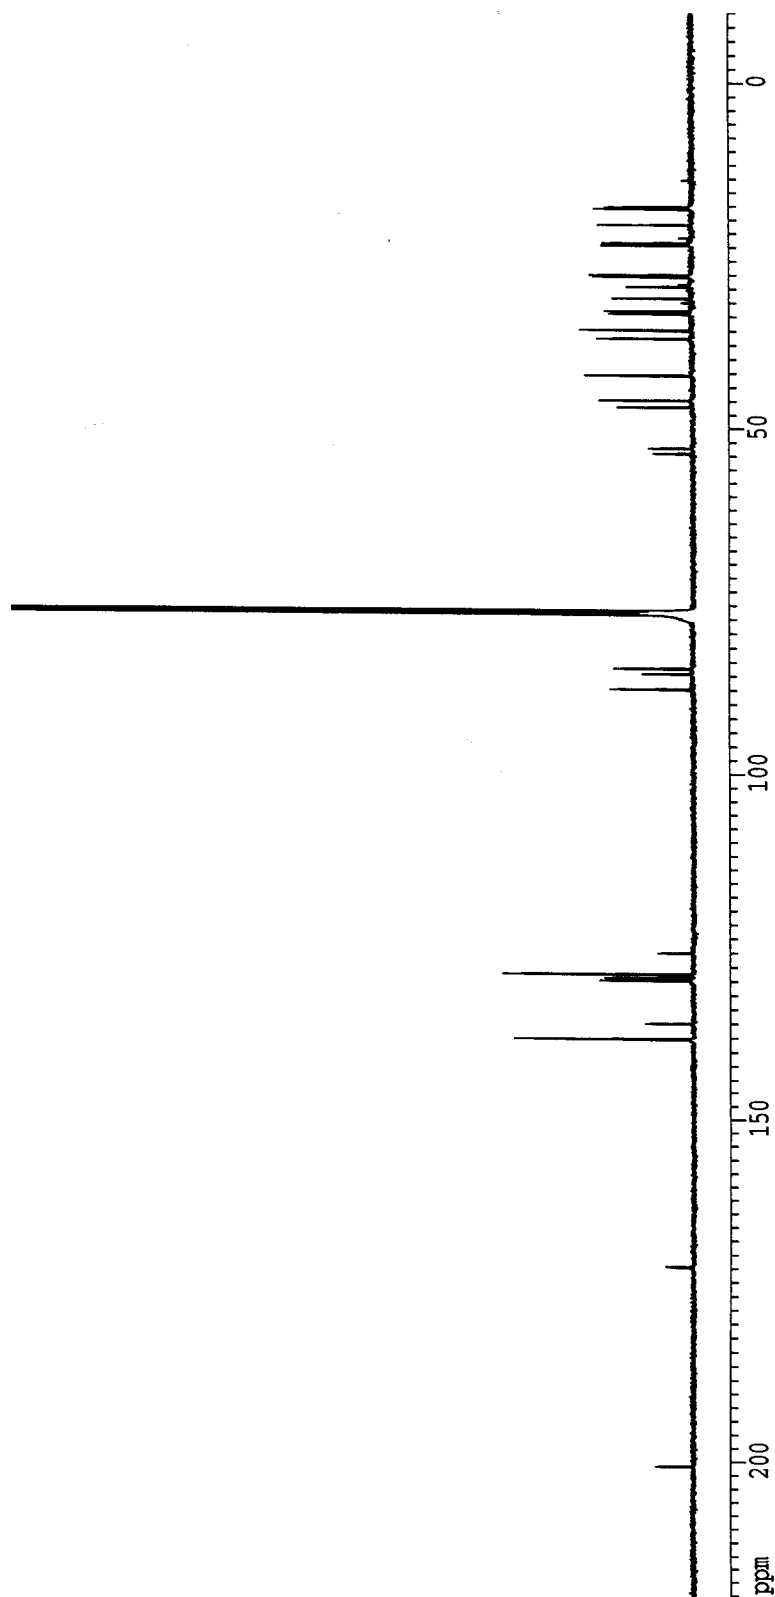

125 MHz  $^{13}\text{C}$  Spectrum of (-)-**S5** in  $\text{CDCl}_3$

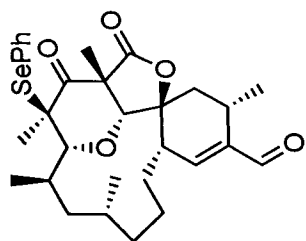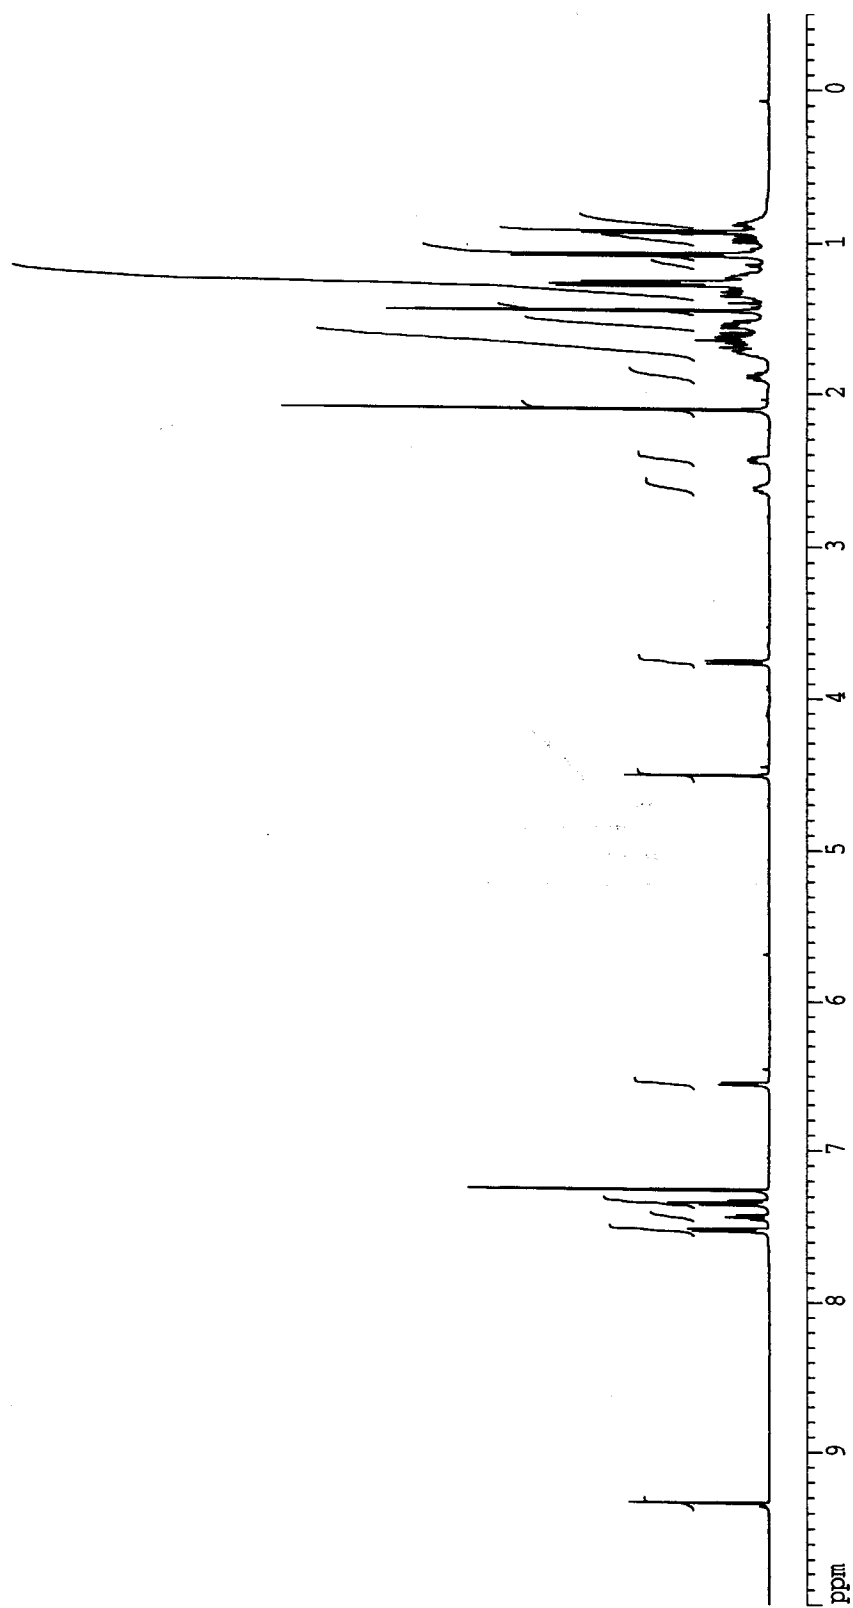

500 MHz  $^1\text{H}$  Spectrum of (-)-**35** in  $\text{CDCl}_3$

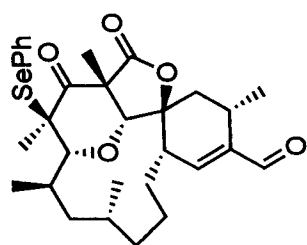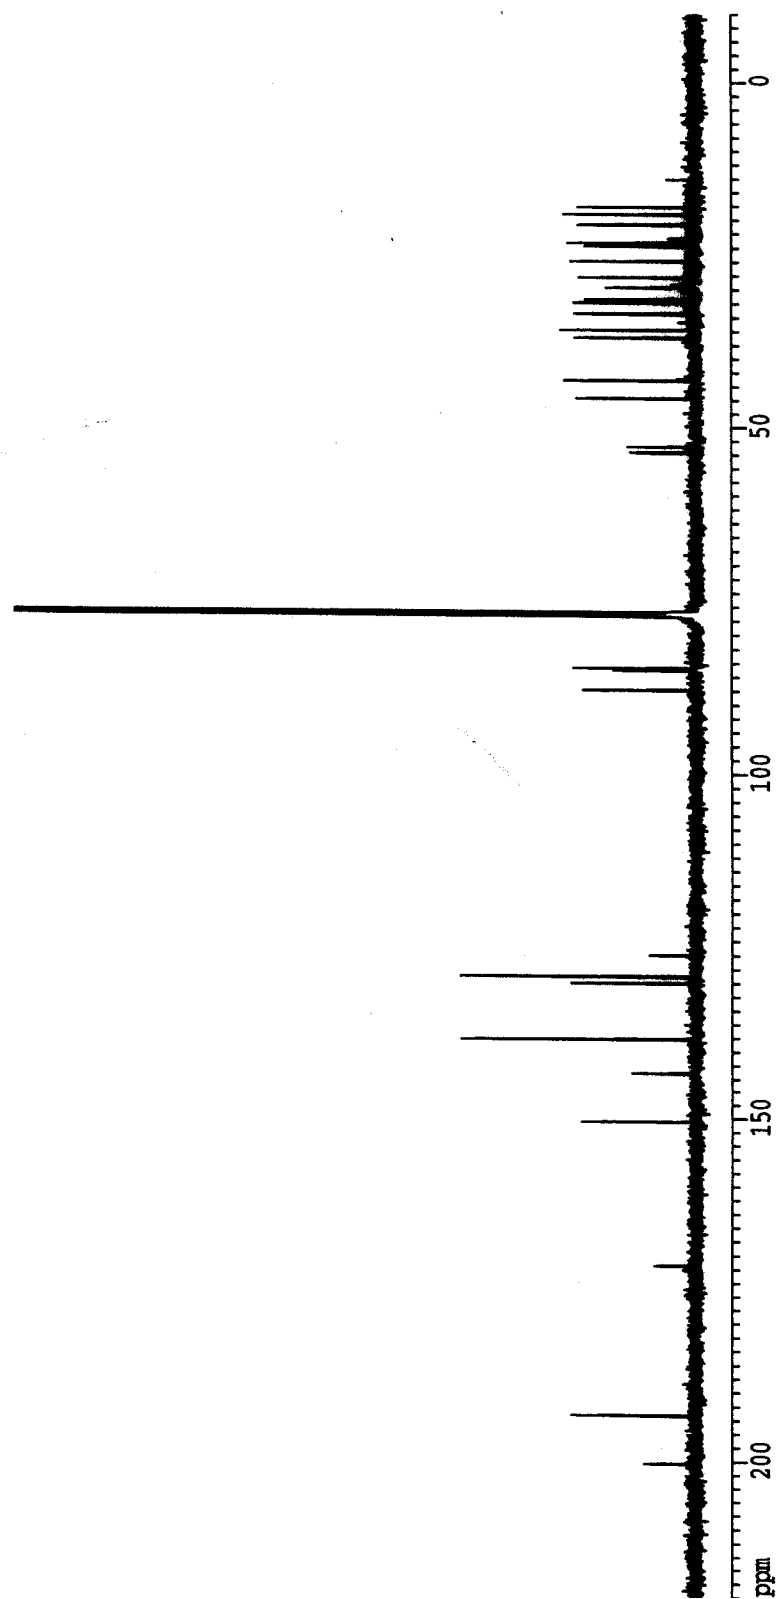

125 MHz  $^{13}\text{C}$  Spectrum of (-)-**35** in  $\text{CDCl}_3$

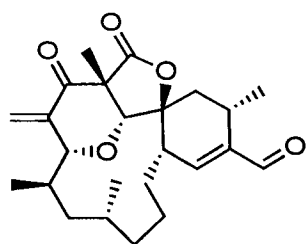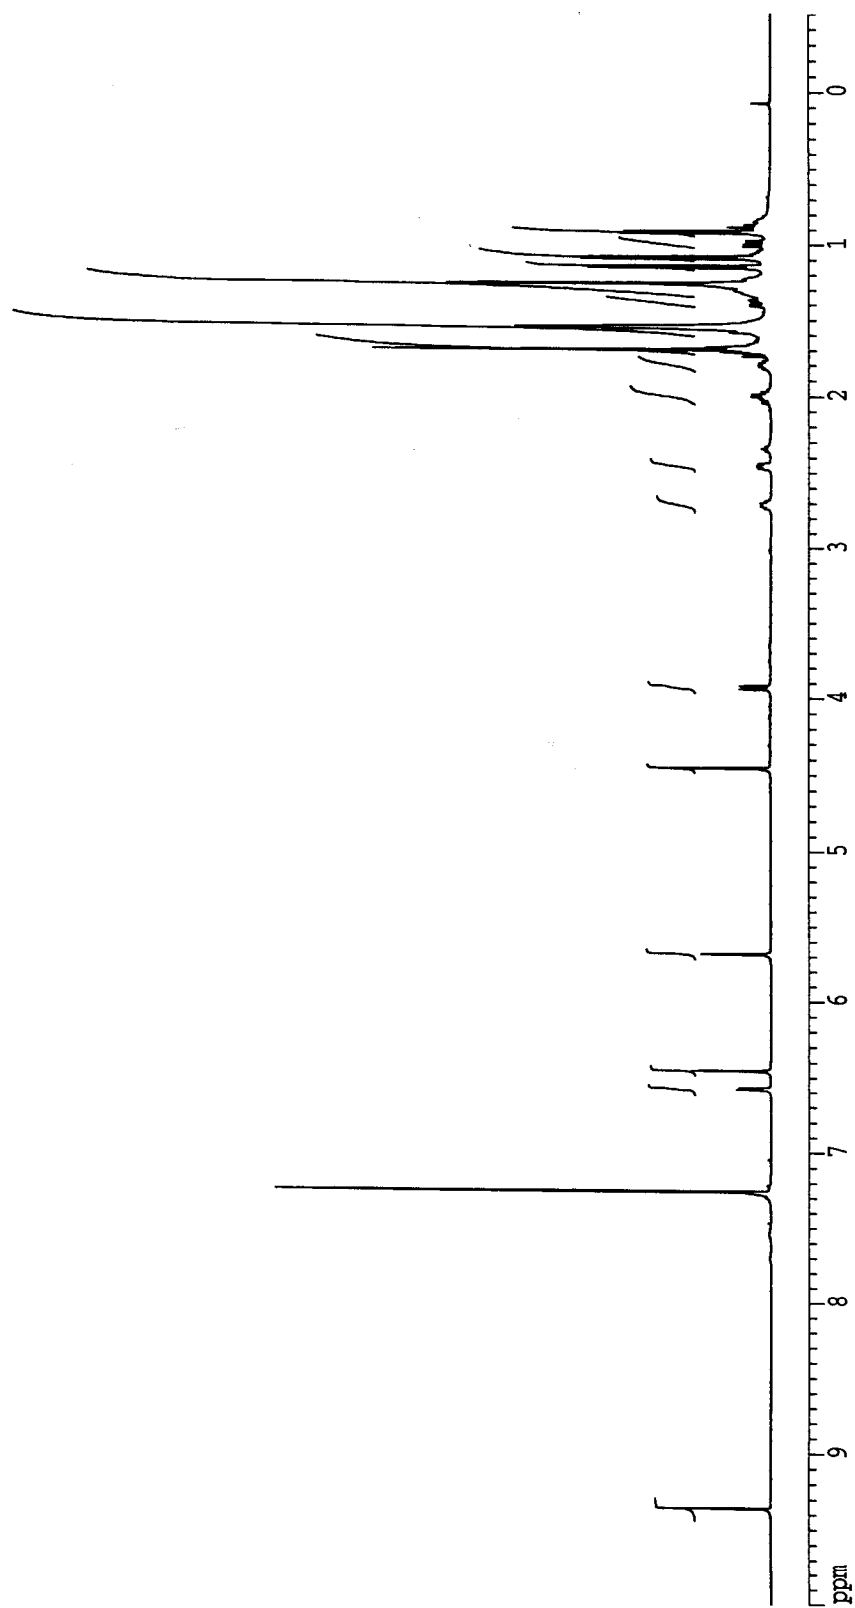

500 MHz <sup>1</sup>H Spectrum of (-)-**S6** in CDCl<sub>3</sub>

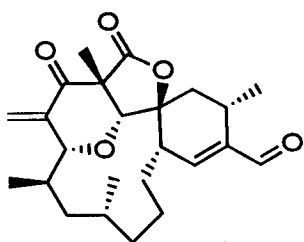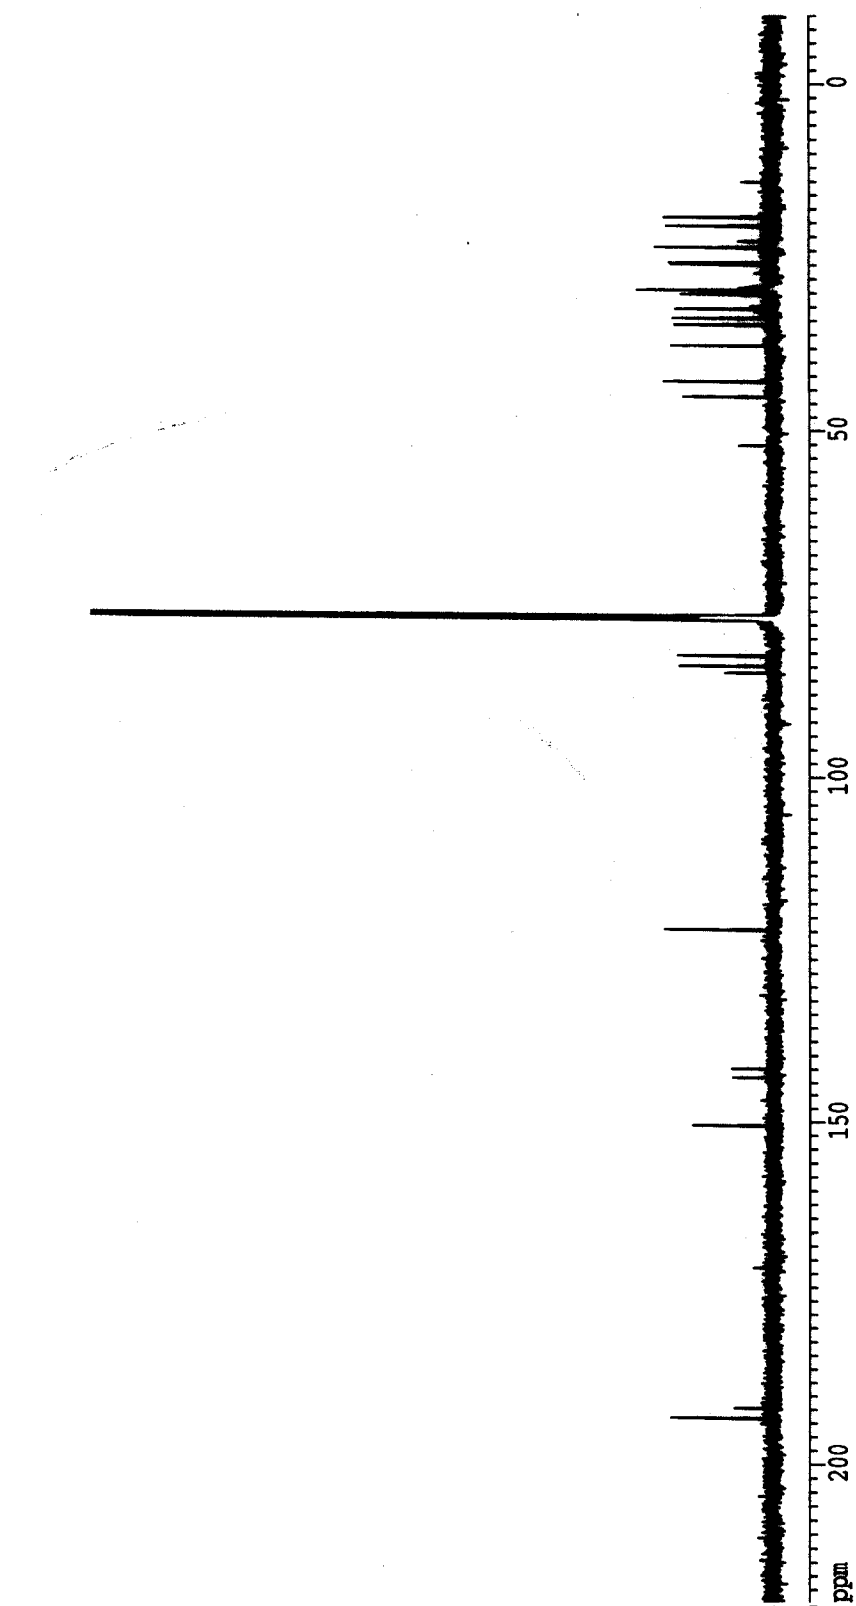

125 MHz  $^{13}\text{C}$  Spectrum of (-)-**S6** in  $\text{CDCl}_3$





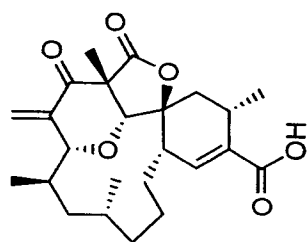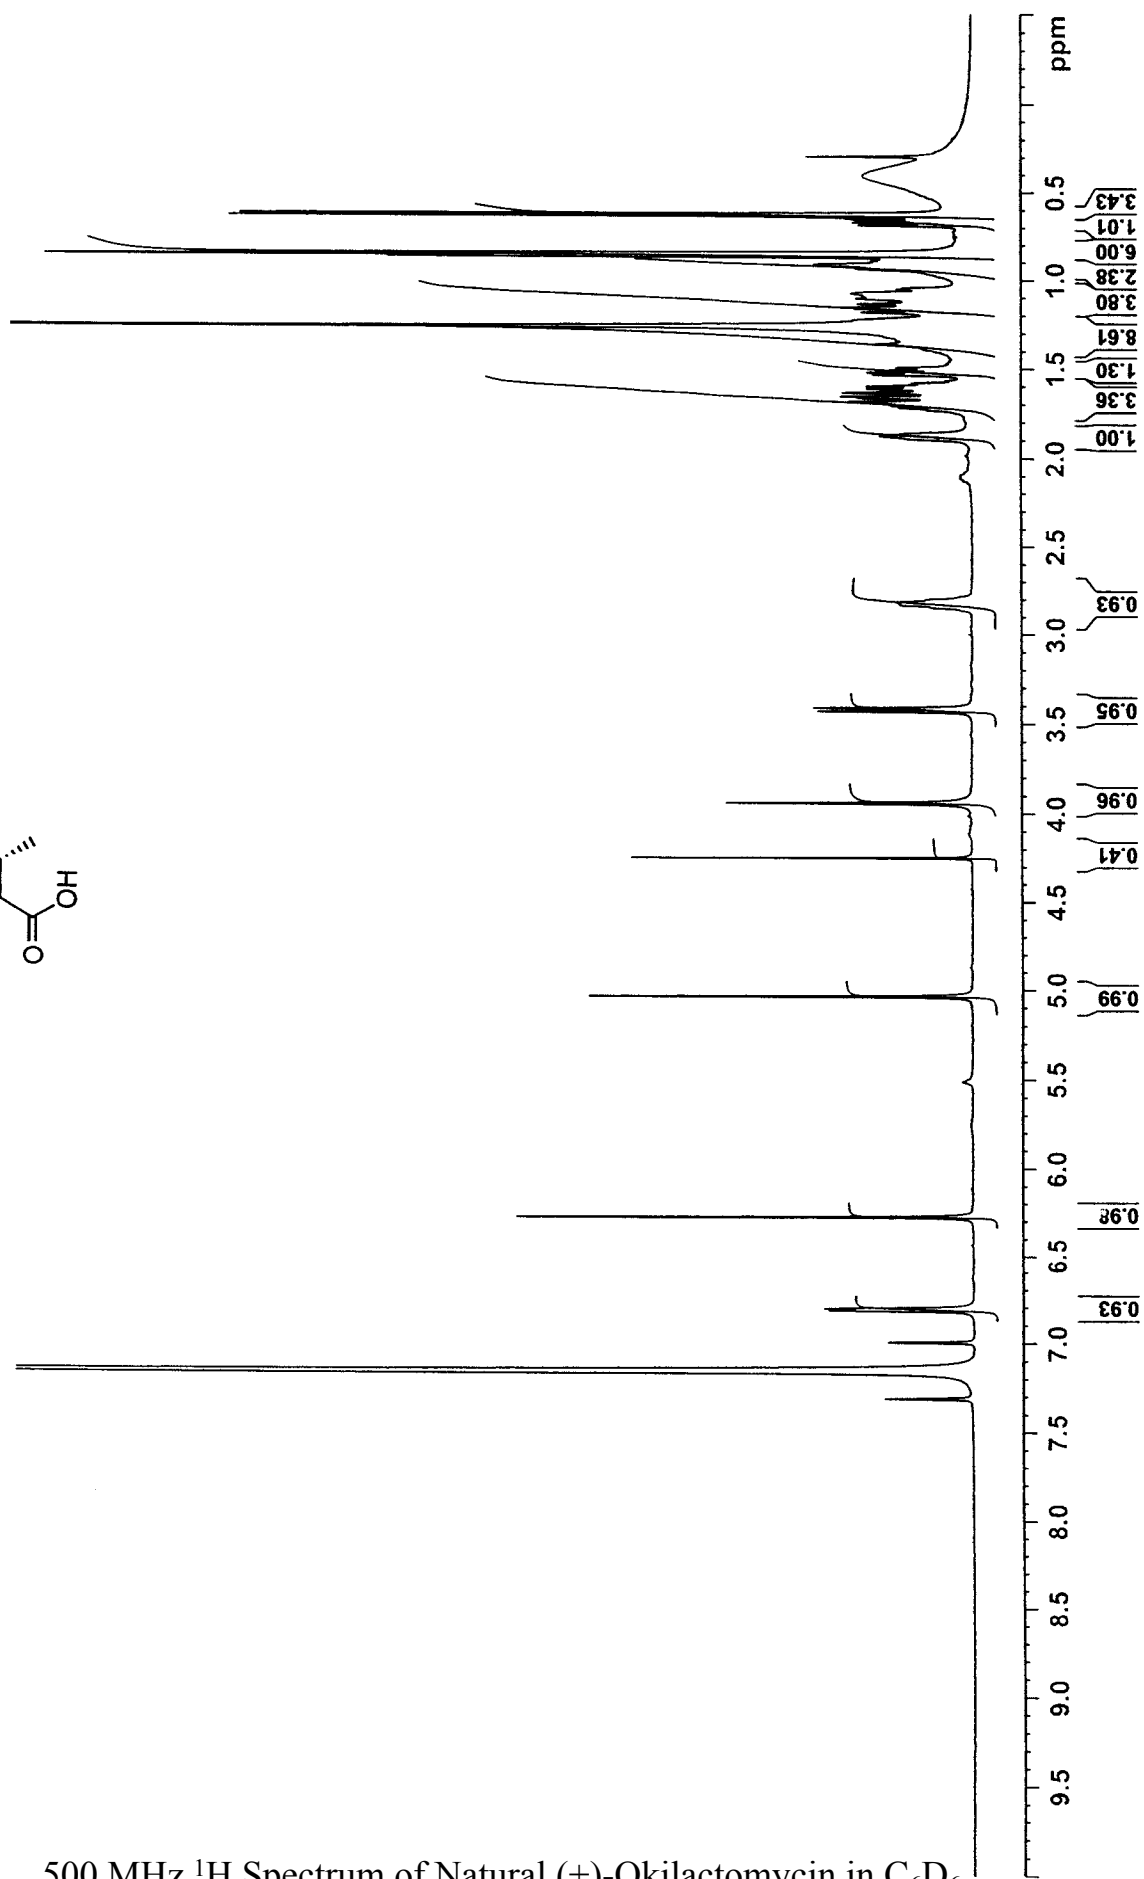

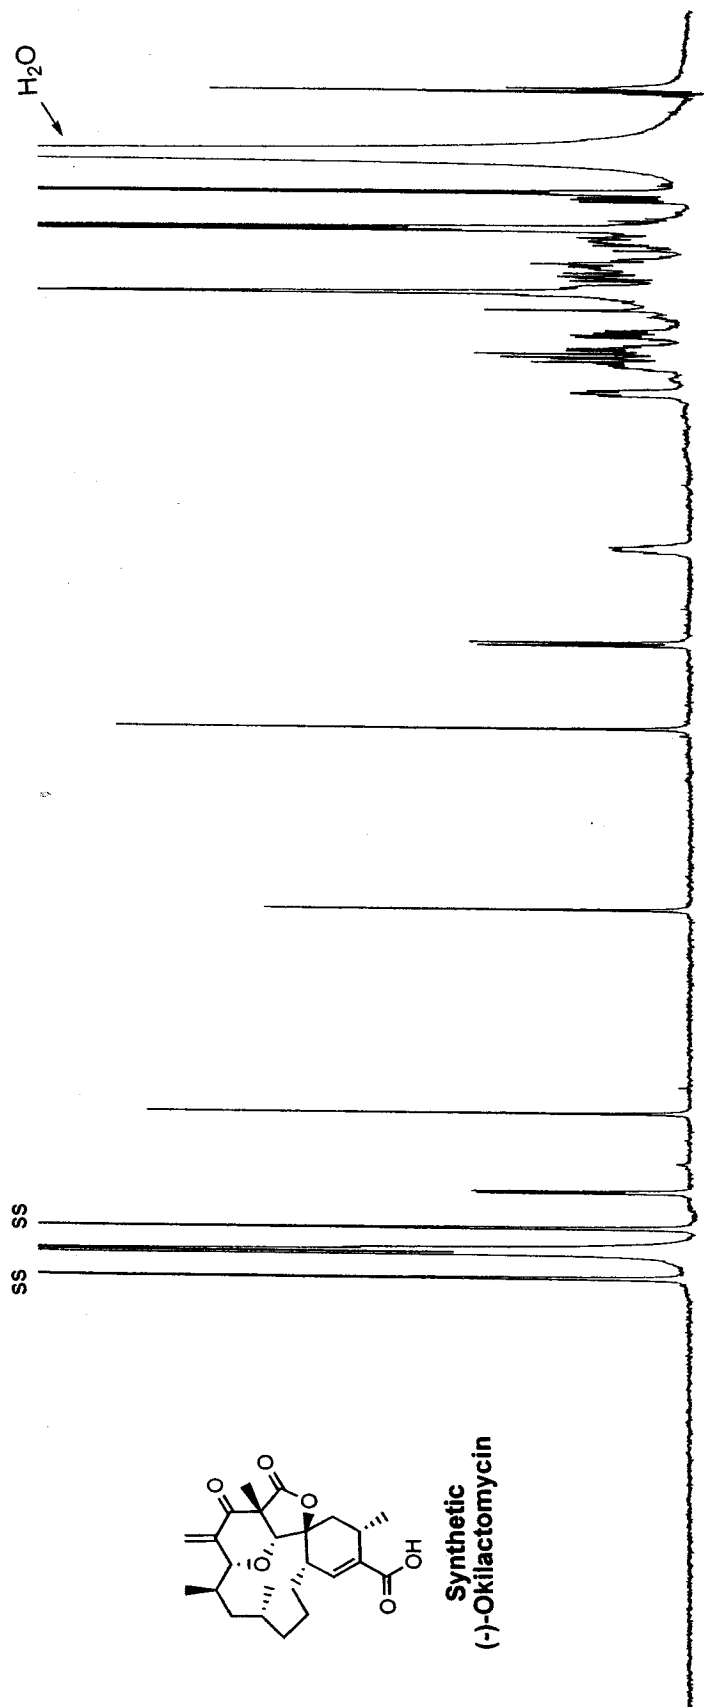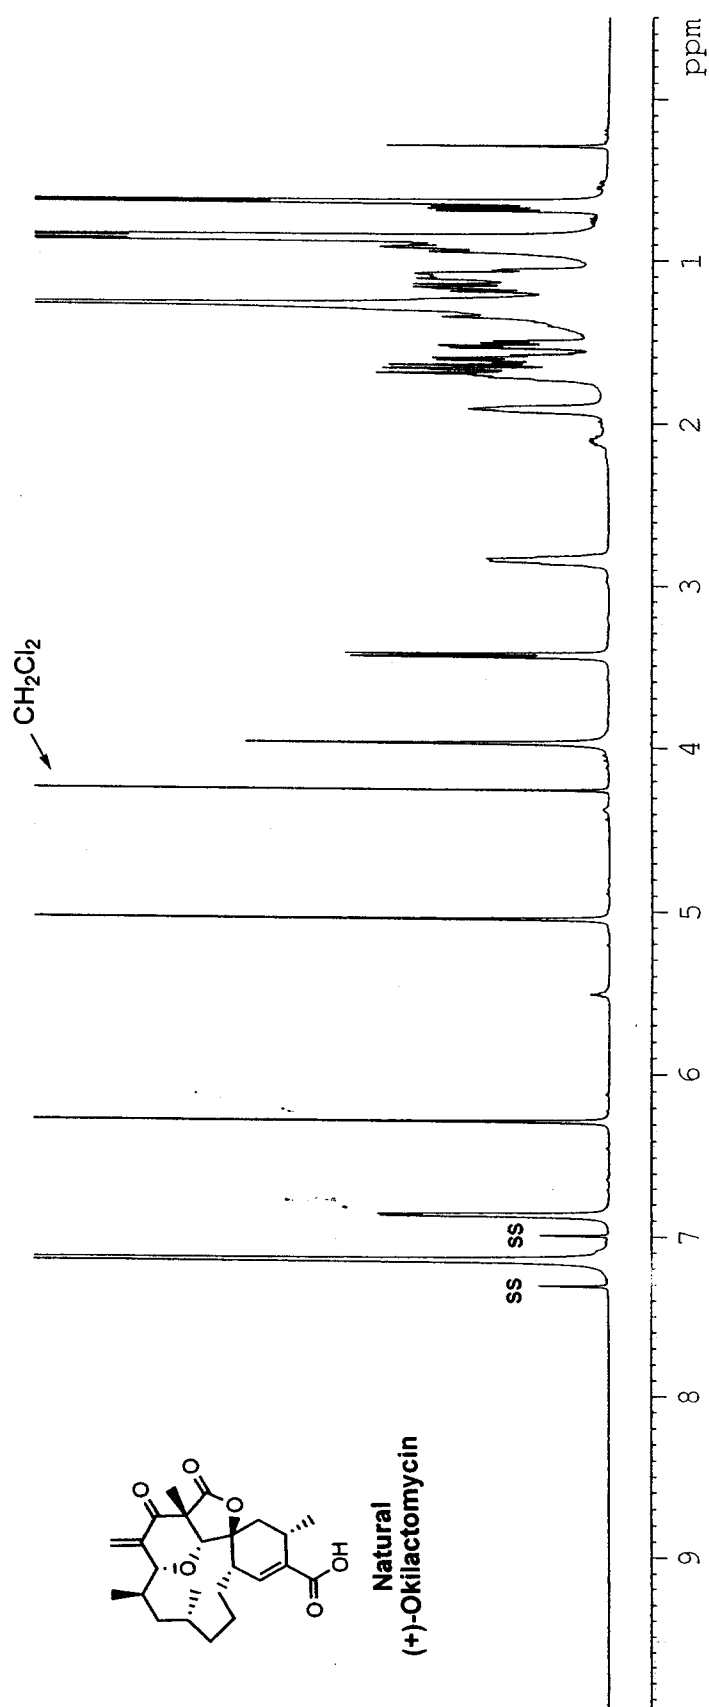

Comparison of <sup>1</sup>H Spectra in C<sub>6</sub>D<sub>6</sub>
